# Supplementary material for: Sterically constrained tricyclic phosphine: redox behaviour, reductive and oxidative cleavage of P–C bonds, generation of a dilithium phosphaindole as a promising synthon in phosphine chemistry
Source: PubMed Central journal article supplement (PMC8179454; doi:10.1039/d0sc06155g), 2021-01-18
Supplement: SC-012-D0SC06155G-s001.pdf [file SC-012-D0SC06155G-s001.pdf]

**Sterically constrained tricyclic phosphine: Redox behaviour, reductive and oxidative cleavage of P-C bonds, generation of a dilithium phosphaindole as a promising synthon in phosphine chemistry**

Alexander Brand,<sup>a</sup> Stephen Schulz,<sup>b</sup> Alexander Hepp,<sup>a</sup> Jan J. Weigand,<sup>\*,b</sup> and Werner Uhl<sup>\*, a</sup>

**Supporting Information**

|     |                                                                                                                        |    |
|-----|------------------------------------------------------------------------------------------------------------------------|----|
| 1   | Electrochemical and spectroelectrochemical data.....                                                                   | 2  |
| 1.1 | General electrochemical procedures .....                                                                               | 2  |
| 1.2 | Cyclic voltammetry data of 3a in PhF, CH <sub>3</sub> CN and THF .....                                                 | 3  |
| 1.3 | Additional <i>in situ</i> UV-vis spectroelectrochemical data and mechanistic investigation of the reduction of 3a..... | 6  |
| 1.4 | Preparative electrochemical reduction of phosphine 3a.....                                                             | 8  |
| 2   | <sup>1</sup> H, <sup>13</sup> C, <sup>31</sup> P and <sup>7</sup> Li NMR spectra .....                                 | 11 |
| 2.1 | NMR-Spectra of Compound 5 .....                                                                                        | 11 |
| 2.2 | NMR-Spectra of Compound 6 .....                                                                                        | 13 |
| 2.3 | NMR-Spectra of Compound 7 .....                                                                                        | 15 |
| 2.4 | NMR-Spectra of Compound 8 .....                                                                                        | 17 |
| 2.5 | NMR-Spectra of Compound 9 .....                                                                                        | 18 |
| 2.6 | NMR-Spectra of Compound 10 .....                                                                                       | 20 |
| 3   | Quantum Chemical Calculations .....                                                                                    | 22 |
| 3.1 | Optimized Structure of 5 in Gas Phase .....                                                                            | 22 |
| 3.2 | Structure of 5 with Dummy Atom for NICS(0) Calculation.....                                                            | 24 |
| 3.3 | Optimized Structure of 7 (S,R) with Solvent-Correction.....                                                            | 26 |
| 3.4 | Optimized Structure of 7 (S,S) with Solvent-Correction.....                                                            | 28 |
| 3.5 | Optimized Structure of Phosphoric Acid as Reference for NMR Calculations.....                                          | 31 |
| 3.6 | Optimized Structure of 7 (S,R) in Gas Phase.....                                                                       | 32 |

|      |                                                                                         |    |
|------|-----------------------------------------------------------------------------------------|----|
| 3.7  | Optimized Structure of 7 (S,S) in Gas Phase .....                                       | 34 |
| 3.8  | Transition-State of Configurational Inversion of 7 at P-Ph in Gas Phase.....            | 37 |
| 3.9  | Transition-State of Configurational Inversion of 7 at PC <sub>4</sub> in Gas Phase..... | 39 |
| 3.10 | Input Line for NMR Calculation of NICS(0) of 5 .....                                    | 42 |
| 3.11 | Input Line for NMR Calculation of Phosphoric Acid.....                                  | 42 |
| 3.12 | Input Line for NMR Calculation of 7 (S,R).....                                          | 42 |
| 3.13 | Input Line for NMR Calculation of 7 (S,S) .....                                         | 42 |

## 1 Electrochemical and spectroelectrochemical data

### 1.1 General electrochemical procedures

All electrochemical (EC) and *in situ* UV-vis spectroelectrochemical (*in situ* SEC) measurements were performed in a Glovebox Pure Lab HE GP-1 SR (Innovative Technology, USA) within an atmosphere of purified nitrogen (<0.1ppm O<sub>2</sub>; <0.1ppm H<sub>2</sub>O). The glovebox was equipped with military grade BNC feedthroughs in a homemade gas tight flange for low noise electrical connection of electrochemical and spectroelectrochemical cells inside. UV-vis-NIR spectroscopy inside the glovebox was performed *via* another homemade, gas tight flange containing four light-tight chambers with optical grade fused silica windows and four 74-UV (Ocean Optics Inc., USA) collimating lenses with SMA 905 connectors for optical fibers. EC and SEC cells were connected to a PGSTAT302 (Metrohm Autolab, Utrecht, The Netherlands) E= ±10 V, U= ±35 V with an auxiliary voltage monitor (BK Precision 2831E, Yorba Linda, CA USA). NOVA Software (Metrohm Autolab) Version 1.11.2 was used to control the potentiostat, magnetic stirring and to trigger the spectrometer. UV-vis spectra recorded by OceanView software (Version 1.4.1, Ocean Optics) were triggered by a DG1032Z arbitrary waveform function generator (Rigol, Beijing, China) controlled by the Nova Software (1.10.4, Fa Metrohm Autolab) using a DAC164 analog/digital converter. Data analysis of the spectral and electrochemical data was carried out using OriginPro 2019 (OriginLab Cooperation, Northampton, MA, USA).

#### Solvent preparation / supporting electrolyte preparation

THF was dried by refluxing with potassium and benzophenone as an indicator until a midnight blue color was established, CH<sub>3</sub>CN and PhF were dried by heating with CaH<sub>2</sub> to reflux conditions for at least 6 h and distillation under Argon onto vacuum activated molecular sieves (CH<sub>3</sub>CN: 3 Å ; PhF, THF: 4 Å, 1·10<sup>-3</sup> mbar, 350 °C, 12 h). Additionally, all solvents were stored over vacuum activated molecular sieves for at least 14 days. [Bu<sub>4</sub>N][OTf] was pre-dried at least 5 times by dissolving in CH<sub>2</sub>Cl<sub>2</sub> and evaporating the solvent to high vacuum at 80 °C. Final drying and removal of HOTf traces was achieved by dissolving in dry benzene and refluxing this solution in a Soxhlet apparatus for 5 days with vacuum activated molecular sieves in the extraction thimble renewed every day. Prior to each measurement the solvent is passed through a Pasteur pipette with an activated (1·10<sup>-3</sup> mbar, 350 °C, 24 h) aluminum oxide bed (D = 5 mm; L = 70 mm) in the glove box before the supporting electrolyte is added.

## 1.2 Cyclic voltammetry data of **3a** in PhF, CH<sub>3</sub>CN and THF

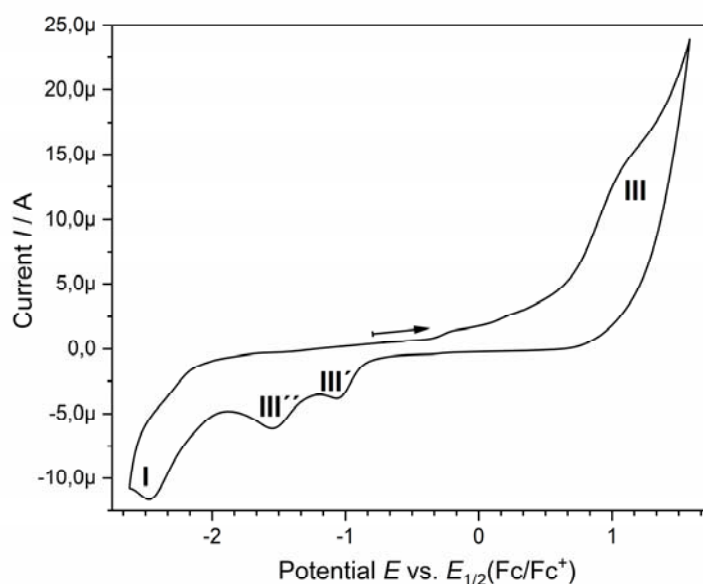

**Figure SI.1.** Cyclic voltammograms (2<sup>nd</sup> cycle;  $\nu = 0.1$  V/s) of phosphine **3a** (3.94 mM) in PhF / 0.1 M [<sup>n</sup>Bu<sub>4</sub>N][OTf] at a  $D = 3$  mm platinum disc electrode.

In PhF as a solvent a substrate-based non-reversible reduction **I** at  $E_{P(\text{red})} = -2.62$  V (vs.  $E_{1/2}(\text{Cp}_2\text{Fe}(\text{Cp}_2\text{Fe}^+))$ ) and a non-reversible oxidation **II** at  $E_{P(\text{ox})} = 1.12$  V were observed as broad peaks in the CV (Figure SI.1.). Square wave voltammetry revealed half-wave potentials according to the CV at  $E_{1/2}(\text{red}) = -2.75$  V for the reduction and  $E_{1/2}(\text{red}) = 0.72$  V for the oxidation reaction. Follow-up reactions are observed after the oxidation reaction **III** in the second cycle as non-reversible re-reduction peaks **III'** and **III''** at  $E_{P(\text{re-red})} = -1.07$  V and  $E_{P(\text{re-red})} = -1.55$  V. Therefore, PhF is not usable as solvent for further spectroelectrochemical investigations due to a low diffusion coefficient of **3a** in the reduction reaction **I** and the follow-up reactions **III''** and **III'''** after the substrate oxidation **III**.

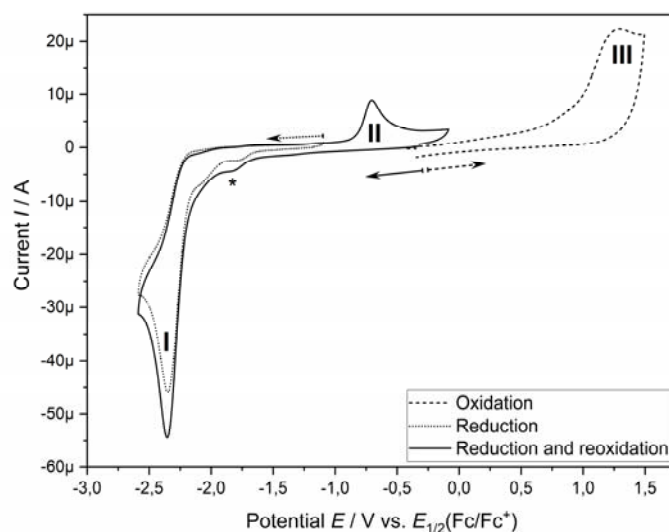

**Figure SI 2.** Cyclic voltammogram of **3a** (3.05 mM) in CH<sub>3</sub>CN / 0.1 M [<sup>n</sup>Bu<sub>4</sub>N][OTf] at a Pt disc electrode ( $D = 3$  mm; 0.1 V/s) with separated reduction and oxidations cycles. Asterisks mark minor impurities.

In CH<sub>3</sub>CN as a solvent phosphine **3a** showed a reasonable sharp non-reversible reduction **I** peak  $E_{P(\text{red})} = -2.36$  V (vs.  $E_{1/2}(\text{Cp}_2\text{Fe}(\text{Cp}_2\text{Fe}^+))$ ; Figure SI.2. dotted curve) attributed to the two-electron reduction mechanism of **3a** to  $[\mathbf{3a}^*]^{2-}$ . The non-reversible oxidation **III** was observed at  $E_{P(\text{ox})} = 1.28$  V

(dashed line). Additionally, extended CV measurements of the reduction reaction **I** show the known two-electron re-oxidation **II** (solid line) of dianion  $[3a']^{2-}$  to  $3a'$  and back to  $3a$  (*vide infra*) at  $E_p(\text{re-ox}) = -0.7$  V. SWV measurements allow an assignment of the half-wave potentials  $E_{1/2}(\text{SWV}) = -2.38$  V to the substrate-based reduction **I** and  $E_{1/2}(\text{SWV}) = 1.15$  V to substrate-based oxidation **II**.

Further investigation of the substrate based reduction **I** and the substrate based oxidation reaction **II** were conducted by a comparison of the full potential window CVs (dashed line) versus the partial CV scan for the oxidation follow-up processes (Figure SI.3., solid line), as well as for the reduction follow-up processes (Figure SI.4., solid line).

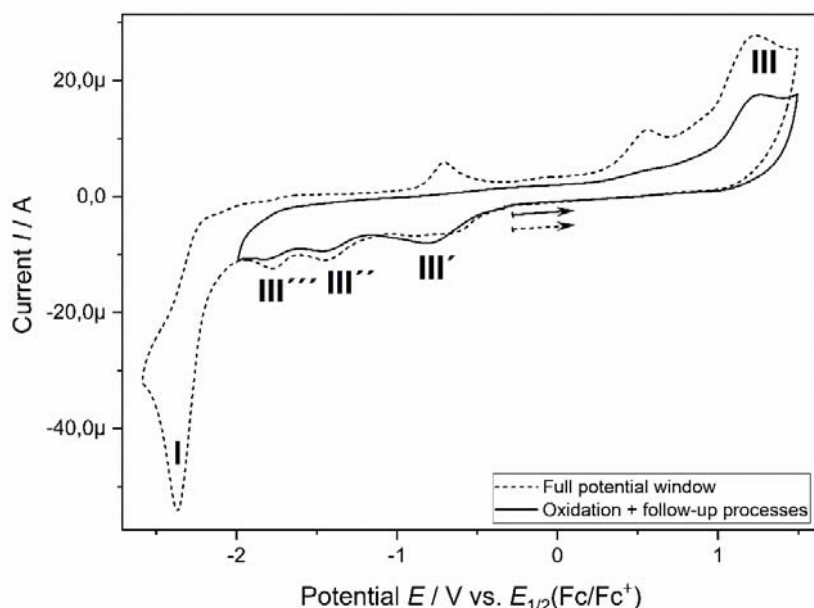

**Figure SI.3.** Different potential (oxidation) scans of the CV (2<sup>nd</sup> cycle;  $\nu = 0.1$  V/s) of phosphine **3a** (3.05 mM) in  $\text{CH}_3\text{CN} / 0.1$  M  $[\text{tBu}_4\text{N}][\text{OTf}]$  at a  $D = 3$  mm platinum disc electrode to assign processes of the full potential window cycle to follow-up reduction processes **III**' - **III**'' of the substrate oxidation process **III**.

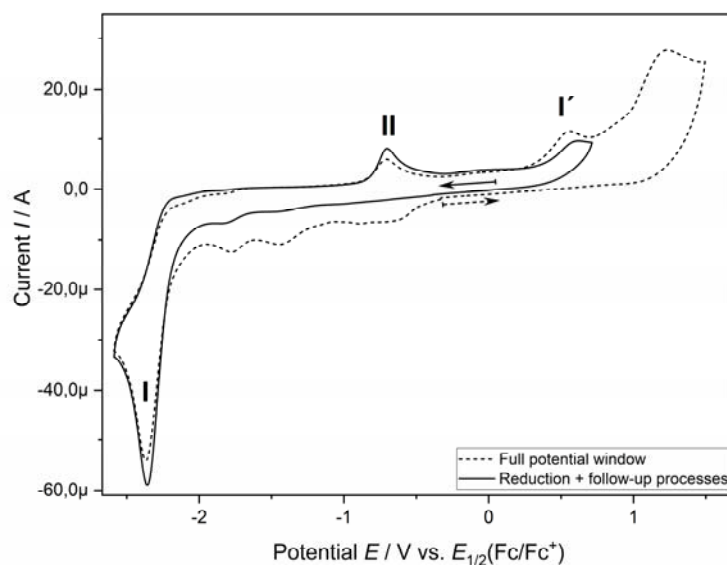

**Figure SI.4.** Different potential (reduction) scans of the CV (2<sup>nd</sup> cycle;  $\nu = 0.1$  V/s) of phosphine **3a** (3.05 mM) in  $\text{CH}_3\text{CN} / 0.1$  M  $[\text{tBu}_4\text{N}][\text{OTf}]$  at a  $D = 3$  mm platinum disc electrode to assign processes of the full potential window cycle to follow-up oxidation processes **II** and **I'** of the substrate reduction process **I**.

Unfortunately, the oxidation **III** of phosphine **3a** leads to three follow-up reduction reactions **III'** / **III''** / **III'''**  $E_{p(\text{red})} = -0.79 / -1.44 / -1.81$  V indicating unwanted reactivity of the oxidation product in acetonitrile (Figure SI.3.). In acetonitrile an additional re-oxidation reaction **I'**  $E_{p(\text{ox})} = 0.55$  V (Figure SI.4.) after the already assigned re-oxidation reaction **II** is also found, rendering acetonitrile as not suitable solvent to handle the two-electron reduction (**I**) product [**3a'**]<sup>2-</sup> due to further reactions. Based on this detailed peak assignment acetonitrile is not suitable for the reduction of phosphine **3a** although the potential range of CH<sub>3</sub>CN (in blank measurements) lead to another prediction.

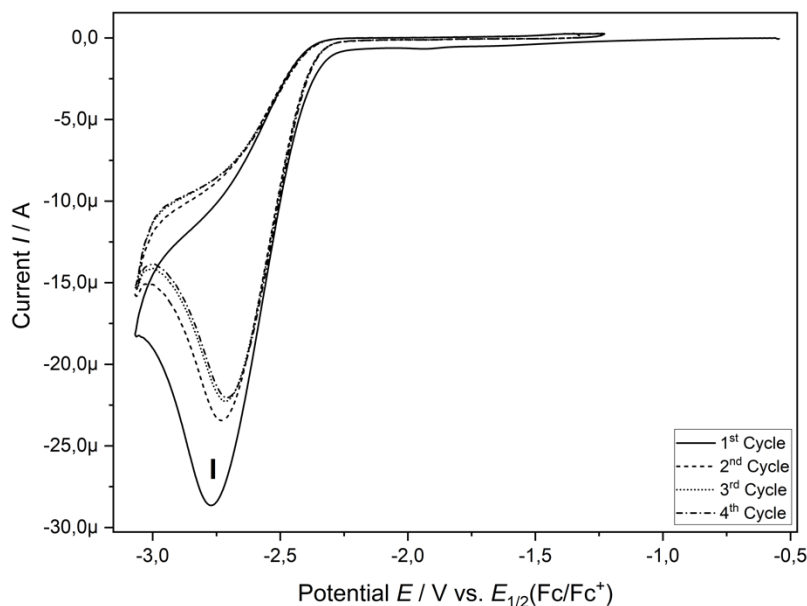

**Figure SI.5.** CV measurement of the reduction only (1<sup>st</sup> to 4<sup>th</sup> cycle;  $\nu = 0.1$  V/s) of phosphine **3a** (2.32 mM) in THF / 0.1 M [<sup>n</sup>Bu<sub>4</sub>N][OTf] at a  $D = 3$  mm platinum disc electrode.  $iR$  Compensated by  $R = 4750 \Omega$ .

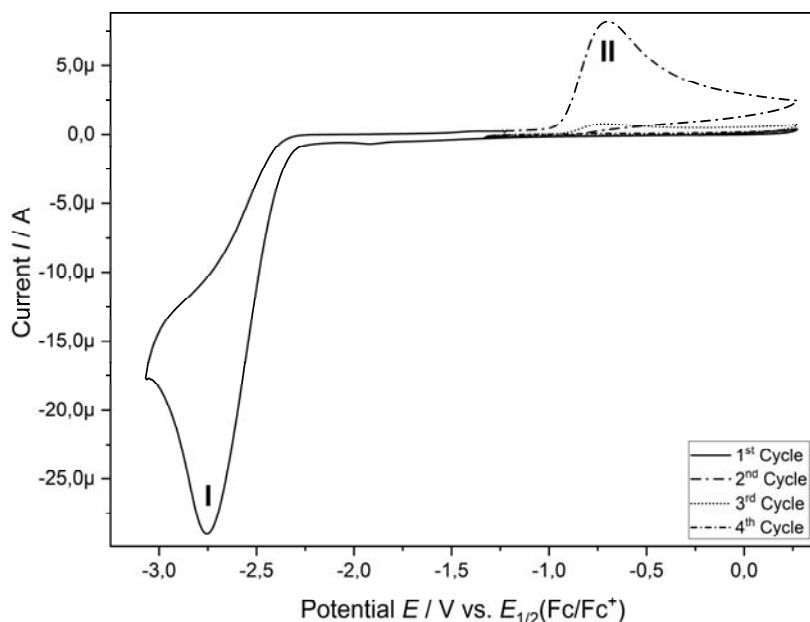

**Figure SI.6.** CV measurement of the reduction **I** in the first cycle and following potential cycling around the reoxidation **II** range [-1.33 – 0.27 V] (2<sup>nd</sup> to 4<sup>th</sup> cycle;  $\nu = 0.1$  V/s) of phosphine **3a** (2.32 mM) in THF / 0.1 M [<sup>n</sup>Bu<sub>4</sub>N][OTf] at a  $D = 3$  mm platinum disc electrode.  $iR$  Compensated by  $R = 4750 \Omega$ .

CV measurements in THF do not allow for the observation of the oxidation reaction due to the limited oxidative potential window, but the reductive stability avoid side reactions after multiple reduction **I** cycles (Figure SI.5.). This enables an exhaustive re-oxidation **II** after the reduction product  $[3a']^{2-}$  is formed (Figure SI.6.). Figure SI.5. shows a CV measurement cycling exclusive around the non-reversible reduction peak **I**. No changes starting from the second cycle are observed is in accordance with the mechanism hypothesis of the two-electron reduction followed by a very fast chemical follow-up reaction forming  $[3a']^{2-}$  without the formation of electro-active side products:  $3a + 2 e^- \rightarrow [3a']^{2-}$  (*EEC* mechanism, see manuscript). Additionally, the back reaction from dianion  $[3a']^{2-}$  to **3a** via an *EEC* mechanism with a slower chemical step. Investigation by composited CV cycles (Figure SI.6.), producing the two-electron reduction **I** product  $[3a']^{2-}$  in a first cycle followed multiple cycles to show the exhaustive properties of the re-oxidation **II** due to limited amounts of  $[3a']^{2-}$  in the diffusion layer from the first cycle.

### 1.3 Additional *in situ* UV-vis spectroelectrochemical data and mechanistic investigation of the reduction of **3a**

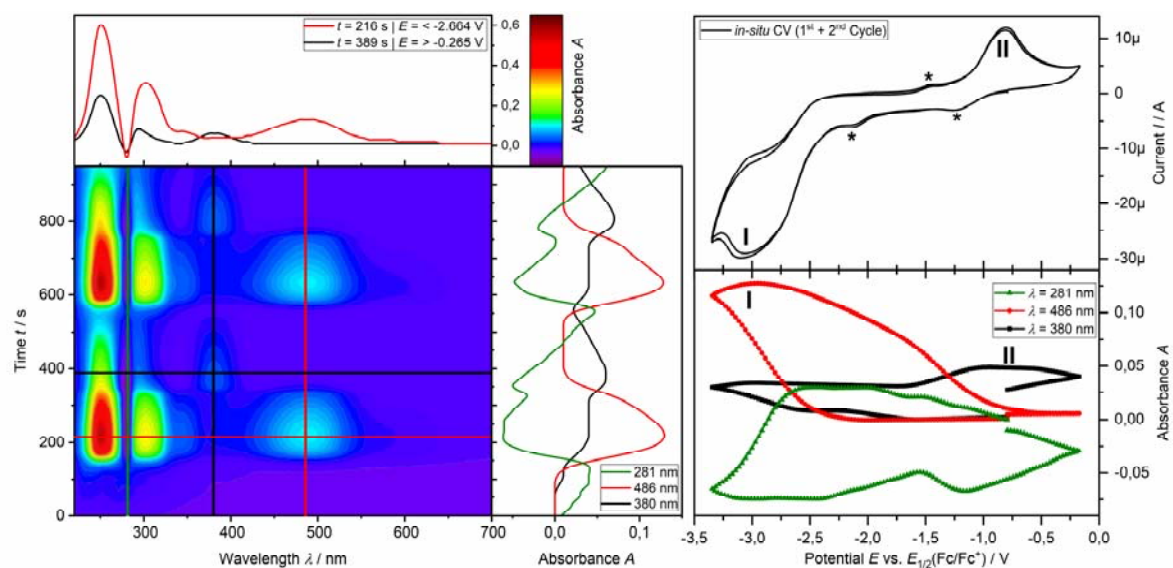

**Figure SI.7.** Spectroelectrochemical CV measurement of the reduction **I** and reoxidation **II** ( $v = -15$  mV/s) of phosphine **3a** (0.84 mM) in THF / 0.1 M  $[nBu_4N][OTf]$  at a platinum grid electrode. Left contour plot: Relative UV-vis spectral changes during 2 cycles of CV; middle vertical plot: time dependent UV-vis absorption; top left: Projected relative UV-vis spectra after reduction **I** (red line) and after reoxidation **II** (black line); top right: *in-situ* CV, bottom right: absorption based CV. Asterisks mark minor impurities.

Spectroelectrochemical *in situ* UV-vis CV measurement Figure 2. (Manuscript) is performed in a high-concentration regime and allows to acquire suitable UV-vis spectra accompanied with a negative effect on the peak shapes. The used concentration (2.50 mM) was chosen to allow for a half-life time determination (*vide infra*). Figure SI.7. depicts the UV-vis CV with a concentration of 0.84 mM for phosphine **3a** leading to peak shapes for reduction **I** and re-oxidation **II** in accordance to the CV data (*vide supra*). The UV-vis spectra detect only traces of the intermediate **3a'** (black line, top left and black line, bottom right) formed after  $[3a']^{2-}$  (red line, bottom right) is re-oxidized (**II**). The reformation of phosphine **3a** is observed by its characteristic absorption (green line, bottom right).

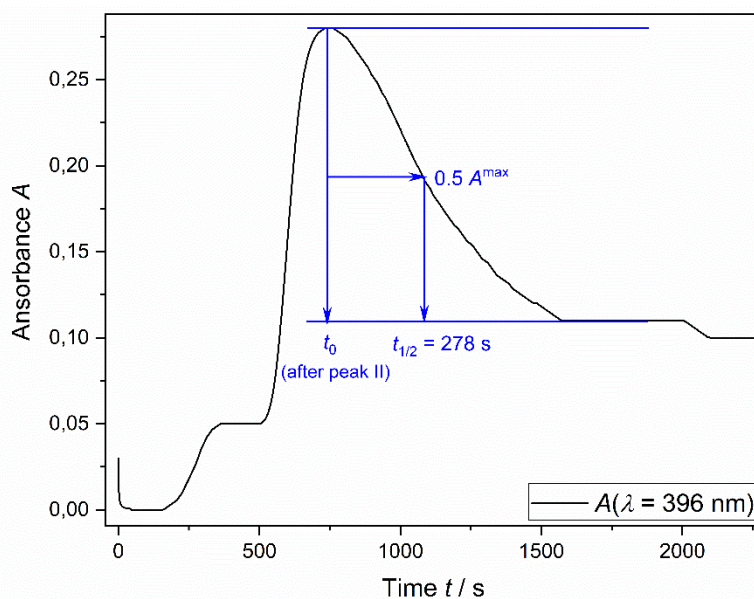

**Figure S8.** Absorbance during the spectroelectrochemical CV measurement (see manuscript Fig. 4) of the characteristic wavelength attributed to intermediate **3a'** and half-life time determination after re-oxidation UV-vis peak **II** ( $v = -10$  mV/s). Phosphine **3a** (2.50 mM) in THF / 0.1 M [ $n$ Bu<sub>4</sub>N][OTf] at a platinum grid electrode in a double-compartment cuvette-cell.

Half-life time measurement of intermediate **3a'** based on a composed UV-vis CV experiment (Figure 4, manuscript) after reduction **I** of **3a** to  $[\mathbf{3a}']^{2-}$  the time after the re-oxidation peak in the UV-vis experiment is used for a half-life time determination (Figure S8.). Assuming the electrochemical formation of intermediate **3a'** has fully proceeded at the maximum of its characteristic UV-vis absorption.

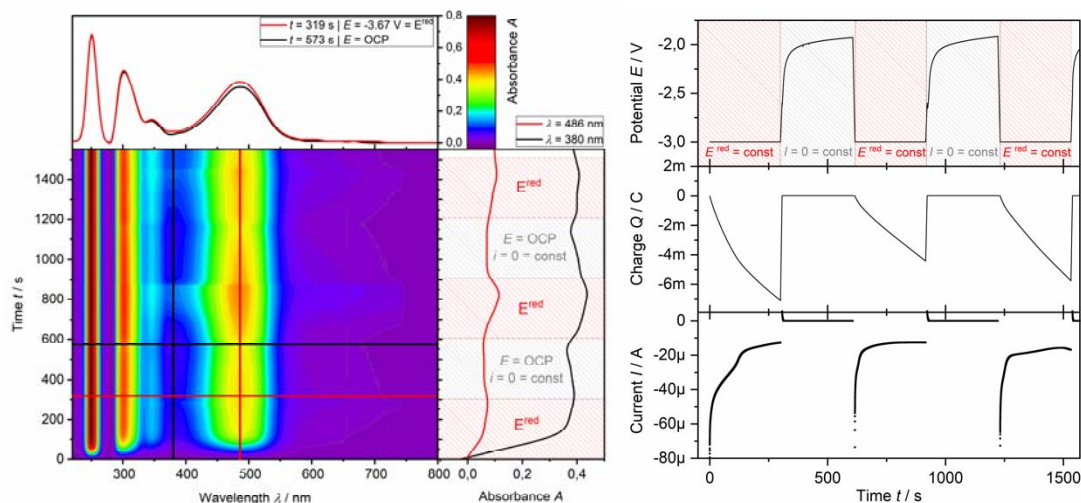

**Figure S9.** *In situ* UV-vis multipulse chrono amperometry / potentiometry (*in situ* UV-vis-MPCACP) of phosphine **3a** (2.50 mM) in THF / 0.1 M [ $n$ Bu<sub>4</sub>N][OTf] at a platinum grid electrode in a double compartment cuvette cell ( $d = 0.5$  mm). Left, bottom: 2D-Plot of relative *in situ* UV-vis spectra during the MPCACV measurement; left, top: UV-vis spectra after the reduction pulse (red line) and after the zero-current pulse (black line); middle vertical: Relative UV-vis absorbance during reduction and zero-current pulses; right top to bottom: chronopotentiogram, chronocoulombogram, chronoamperogram.

In addition to the *in situ* UV-vis MPCA experiment (Figure 5, manuscript) a background experiment was designed in order to differentiate between diffusion and re-oxidation of dianion  $[\mathbf{3a}']^{2-}$  to **3a**. Therefore, a chronoamperometric pulse to trigger the reduction **I** reaction  $\mathbf{3a} \rightarrow [\mathbf{3a}']^{2-}$  was applied, followed by a chronopotentiometric pulse controlling the current to zero. During the



chronopotentiometric pulse no reduction or re-oxidation happened. Only diffusion effect from the thin-layer area to the bulk compartment of the double-compartment cuvette-cell can take place. The losses by diffusion effects during the time with zero current conditions show only slight changes on the concentration of  $[\mathbf{3a}']^{2-}$  in the cuvette cell. According to this finding, the reduction **I** and re-oxidation **II** in the *in situ* UV-vis MPCA measurement Figure 4 (manuscript) is suitable to proof the stability, spectroscopic and chemical reversibility of the reactions between **3a** and  $[\mathbf{3a}']^{2-}$ .

In addition to the half-life time measurement of the intermediate  $\mathbf{3a}'$  for the *EEC* reoxidation-mechanism ( $[\mathbf{3a}']^{2-} \rightarrow \mathbf{3a}$ ) the *EEC* reduction-mechanism ( $\mathbf{3a} \rightarrow [\mathbf{3a}']^{2-}$ ) was further investigated. The *EEC* hypothesis of the reduction is given by a CV experiment with an elevated scan rate of  $\nu = 10$  V/s (Figure SI10). The reduction peak **I** has significantly broadened but remains up to 10 V/s non-reversible. Separation of the *EE* and *C* part of the mechanism was not possible due to the fast chemical follow-up reaction.

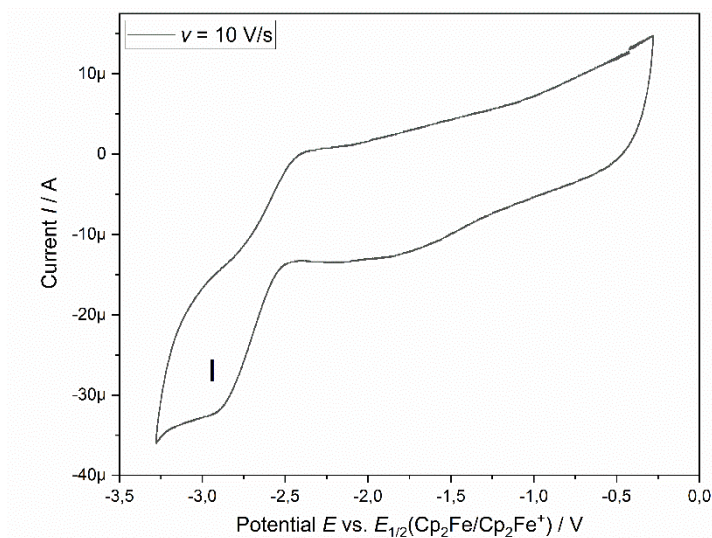

**Figure SI10.** CV measurement of the (2<sup>nd</sup> cycle;  $\nu = 10$  V/s) of phosphine **3a** (4.25 mM) in THF / 0.1 M  $[\text{Bu}_4\text{N}][\text{OTf}]$  at a  $D = 3$  mm platinum disc electrode. No *iR* compensation.

#### 1.4 Preparative electrochemical reduction of phosphine **3a**

Preparative electrochemical synthesis was used to gain UV-vis data of the reduction product dianion  $[\mathbf{3a}']^{2-}$  on a preparative scale. Based on the assumed low diffusion coefficient deduced from the CV data potentiostatic conditions were chosen. Therefore, a solution of 0.28 mmol phosphine **3a** in 35 mL THF with 0.1 M  $[\text{Bu}_4\text{N}][\text{OTf}]$  as supporting electrolyte was used in the working electrode compartment of a H-type Schlenk electrolysis cell (Fa. HMTG GmbH, Drensteinfurt, Germany) divided by two D4 glass sinter plates. A platinum sheet metal (25\*25 mm) is used as a working electrode together with 3 mm Pt disc electrode for *in situ* CV measurements. The counter electrode is based on a graphite rod (H\*D = 35\*15 mm) in 15 mL THF electrolyte, separated by another 5 mL electrolyte in the ion bridge compartment.

Electrolyses was performed potentiostatic with  $E = -3.00$  V at room temperature insight a nitrogen filled glove box. Figure SI11 shows the current over time and after integration the charge consumption. After 60 min of electrolysis time an *in situ* CV was measured by switching from the preparative to the analytical Pt disc electrode. The potentiostatic synthesis was stopped after 20 h to avoid contamination from the counter electrode compartment. Due to the low current a conversion of only 34% based on a two-electron process with 100% current yield was achieved.



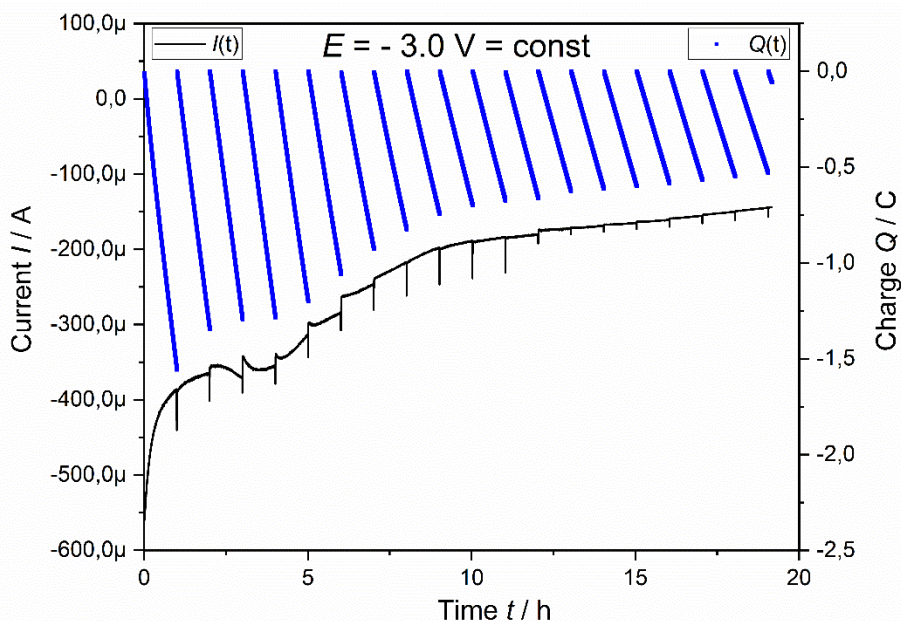

**Figure SI11.** Current and charge during the potentiostatic electrolysis of phosphine **3a** (8.00 mM) in THF / 0.1 M [<sup>n</sup>Bu<sub>4</sub>N][OTf] at a platinum sheet working electrode (25\*25 mm) in a separated H-type cell. Samples were taken every 60 min.

*In situ* CV before the electrolysis (Figure SI12) show a very broad peak **I** for the reduction process, due to the high concentration of phosphine **3a** in the preparative electrolysis cell. The reoxidation peak **II** also showing a reasonable broadening and low intensity. After 23% conversion and a drastic color change from yellow to deep red (insert figure SI13) the CV show a significant increase of the reoxidation peak **II** due to the formed bulk concentration of [**3a**]<sup>2-</sup> from the preparative reduction. Further low intensity peaks (\*) indicate side reactions between decompositions products from the counter electrode compartment caused by the prolonged electrolysis time.

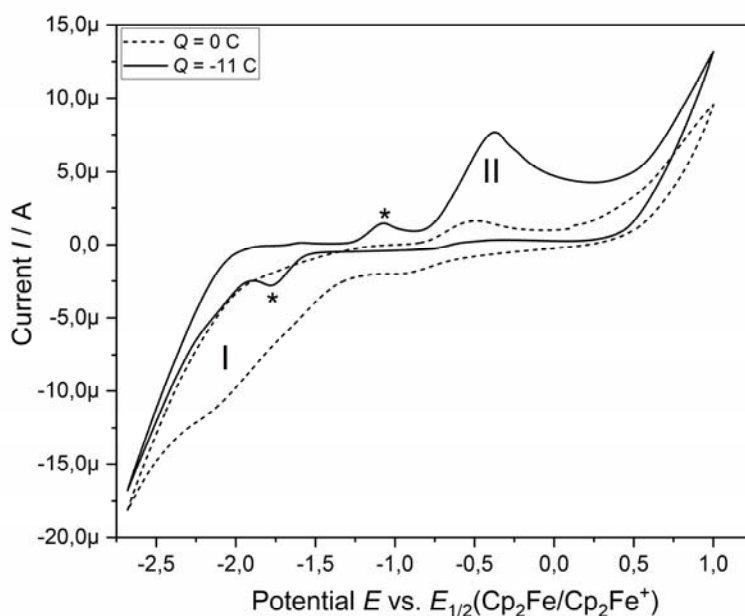

**Figure SI12.** *In situ* CV measurement of the (2<sup>nd</sup> cycle;  $\nu = 0.1$  V/s) of phosphine **3a** (8.00 mM) in THF / 0.1 M [<sup>n</sup>Bu<sub>4</sub>N][OTf] at a  $D = 3$  mm platinum disc electrode during the potentiostatic electrolysis in the beginning ( $Q = 0$  C; 0% conversion) and after 20 h ( $Q = -11.0$  C; 22.8% conversion,  $n = 2 e^-$ ) No  $iR$  compensation. External ferrocene reference of the RE after the electrolysis.

UV-vis NIR spectroscopy (Figure S112, black line) indicate the comparable vis band to the *in situ* UV-vis CV experiment (Fig. 2, manuscript) at  $\lambda = 485$  nm assigned to dication  $[\mathbf{3a}']^{2-}$ . While remeasuring the separated solution after storage at  $-30$  °C under inert conditions a significant decomposition is observed in the UV-vis spectrum (Figure S112, red line).

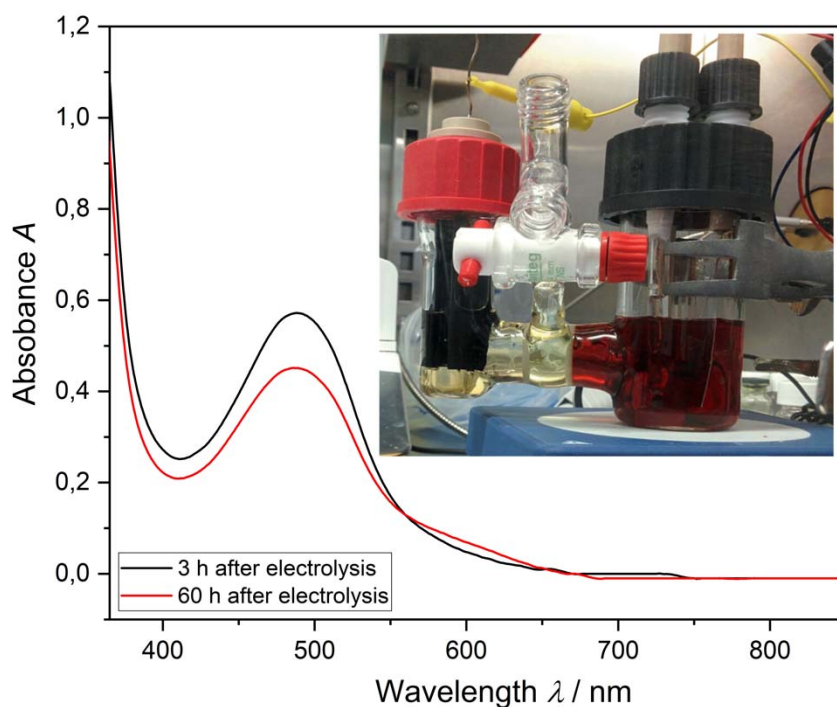

**Figure S113.** UV-vis NIR spectra of the working electrode solution (1:10 diluted in 0.1 M  $[\text{nBu}_4\text{N}][\text{OTf}]$ ,  $d = 1$  cm) after 34,0% conversion ( $Q = -16.0$  C;  $n = 2 e^-$ ) and after additional 60 h stored at  $-30$  °C. Inset: Photo of the double separated electrolysis cell (left CE, right WE compartment).

Attempts to isolate and crystallize dianion  $[\mathbf{3a}']^{2-}$  as its tetrabutyl ammonium salt  $[\text{nBu}_4\text{N}]_2[\mathbf{3a}']$  from the electrolyte failed due to the high supporting electrolyte content or the decomposition taking place. This support the necessity of the use of lithium-based reduction reagents to further stabilize the dianion  $[\mathbf{3a}']^{2-}$  by formation of a Li-C bond.

## 2 $^1\text{H}$ , $^{13}\text{C}$ , $^{31}\text{P}$ and $^7\text{Li}$ NMR spectra

### 2.1 NMR-Spectra of Compound 5

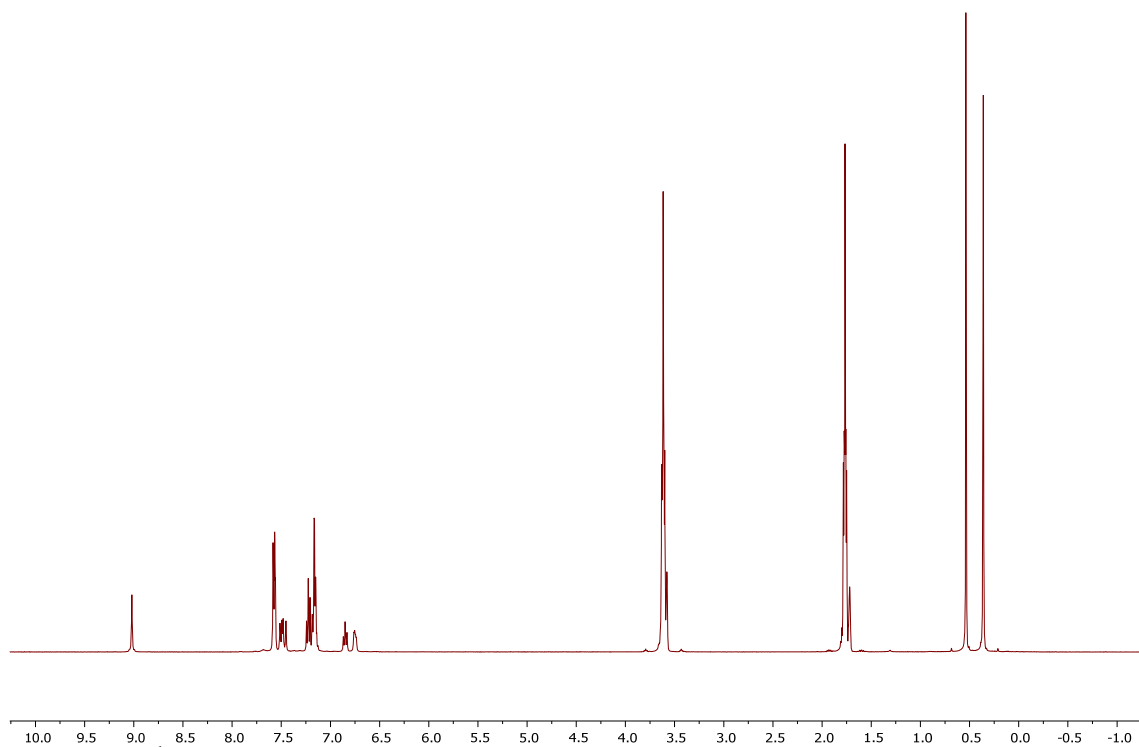

Figure S14:  $^1\text{H}$ -NMR spectrum of **5** in  $\text{d}_8$ -THF

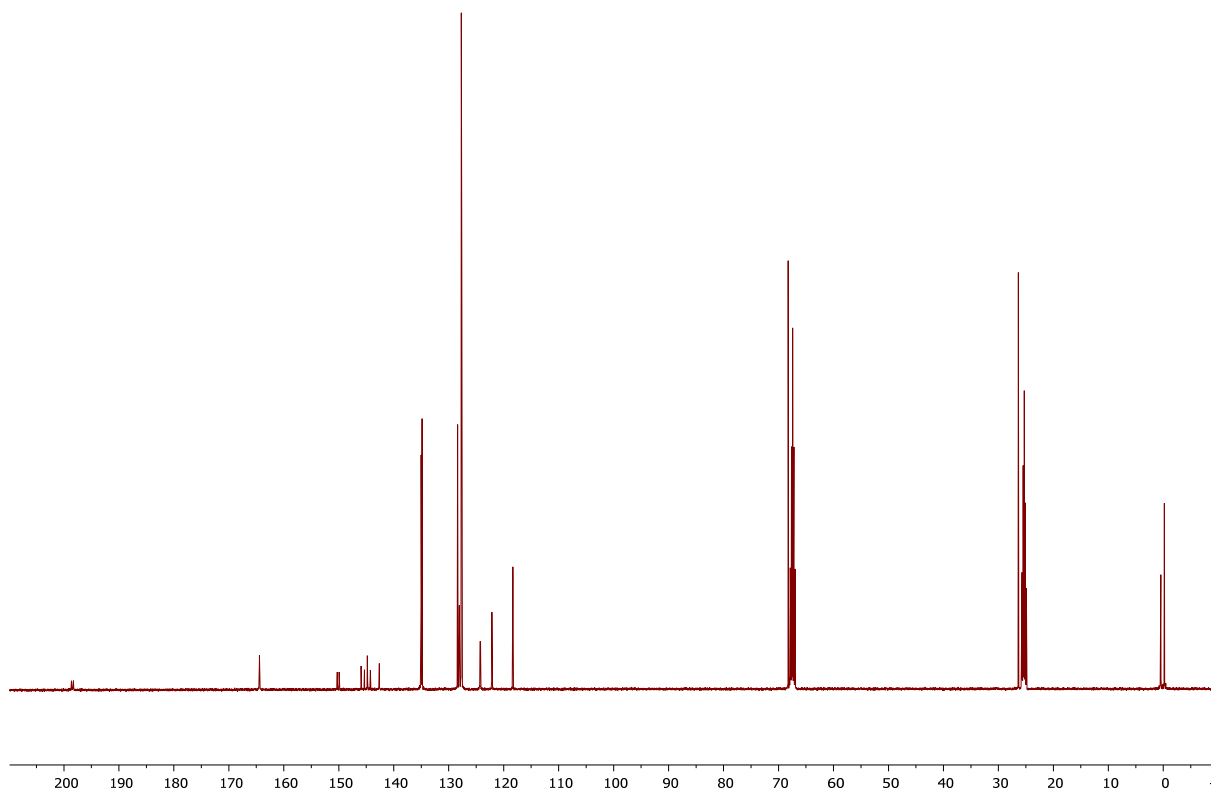

Figure S15:  $^{13}\text{C}\{^1\text{H}\}$ -NMR spectrum of **5** in  $\text{d}_8$ -THF

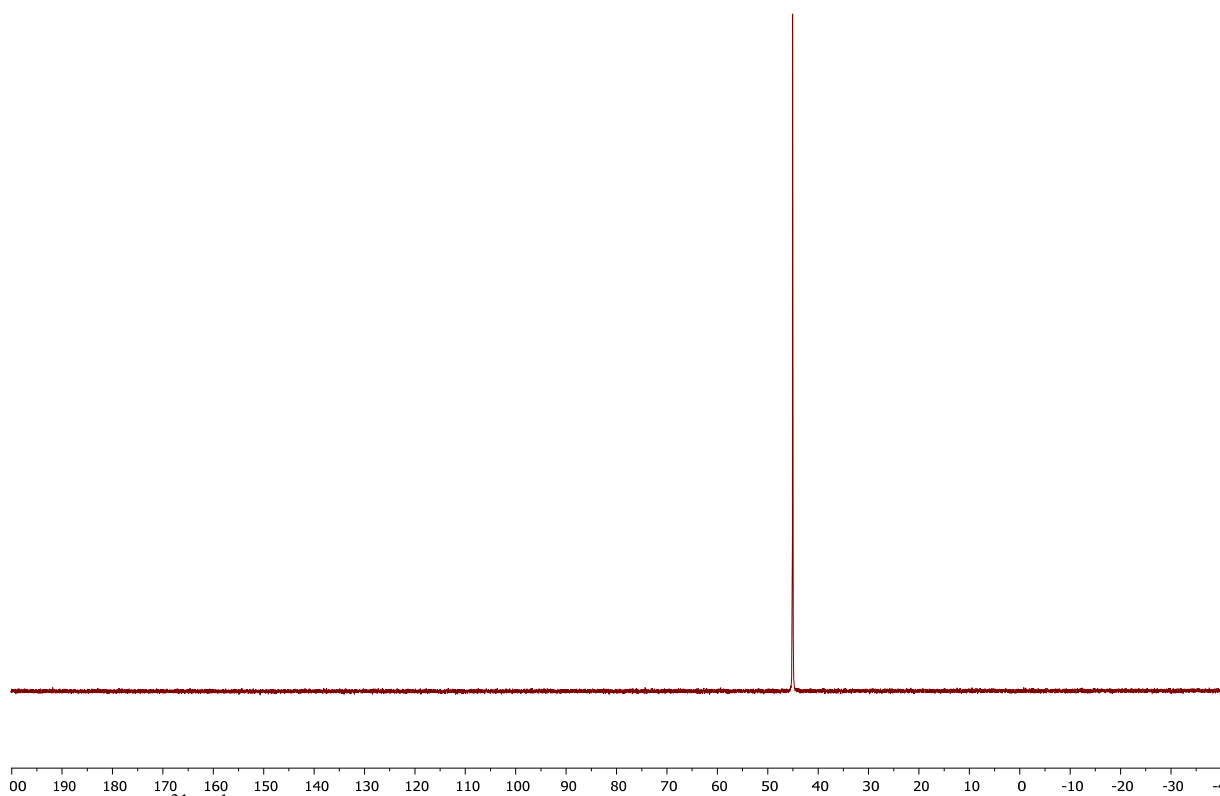

Figure S16:  $^{31}\text{P}\{^1\text{H}\}$ -NMR spectrum of **5** in  $d_8$ -THF

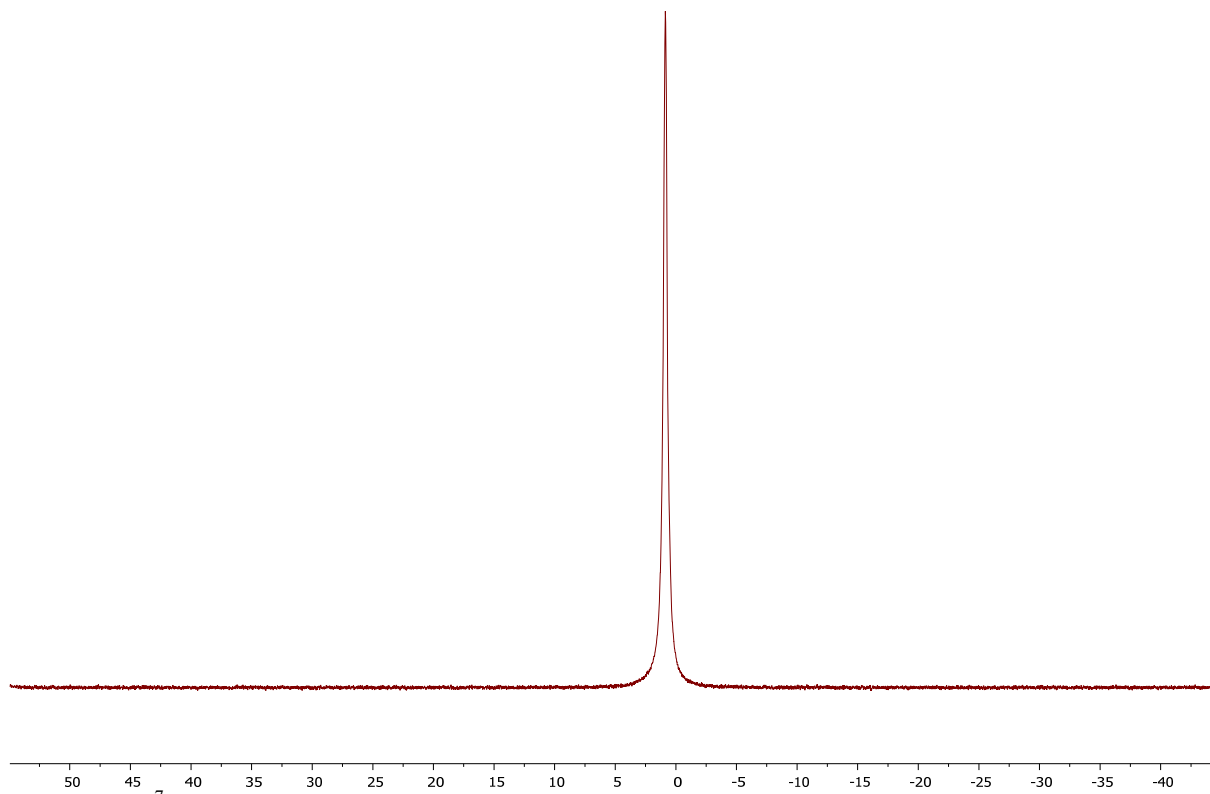

Figure S17:  $^7\text{Li}$ -NMR spectrum of **5** in  $d_8$ -THF

## 2.2 NMR-Spectra of Compound **6**

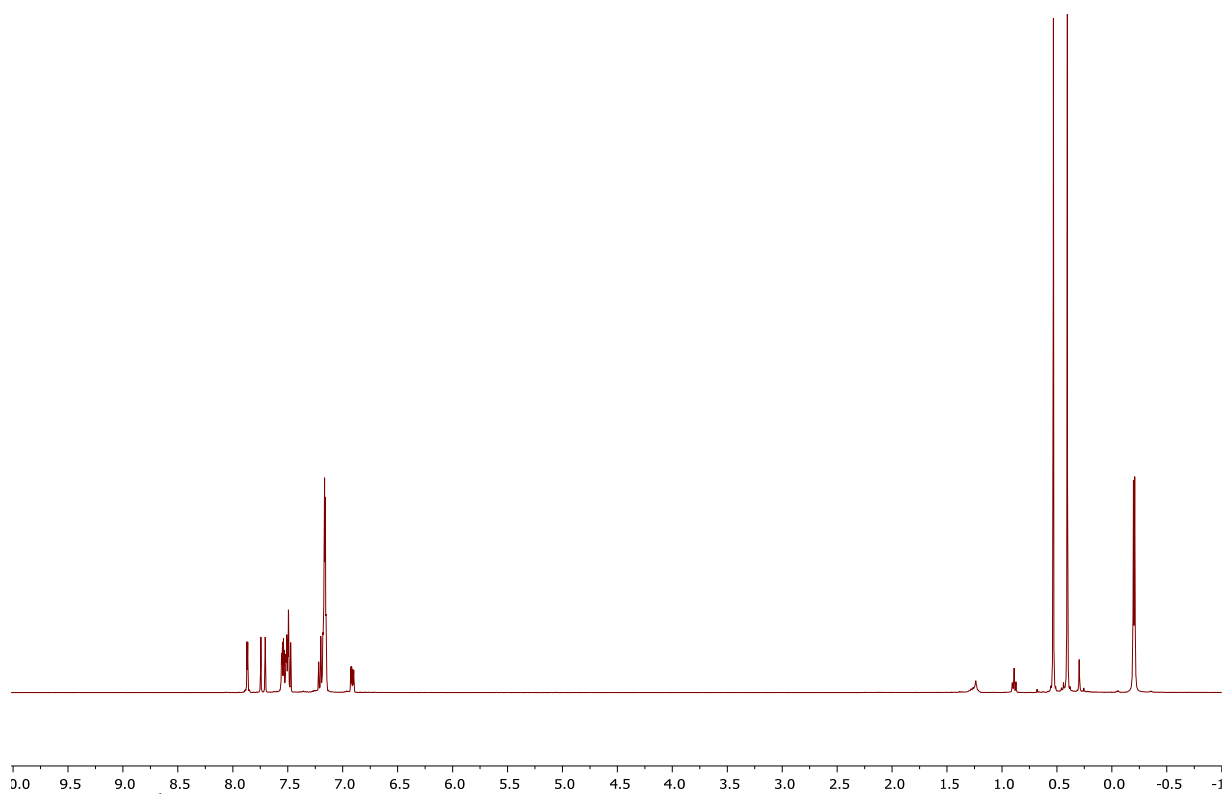

Figure S18:  $^1\text{H-NMR}$  spectrum of **6** in  $\text{C}_6\text{D}_6$

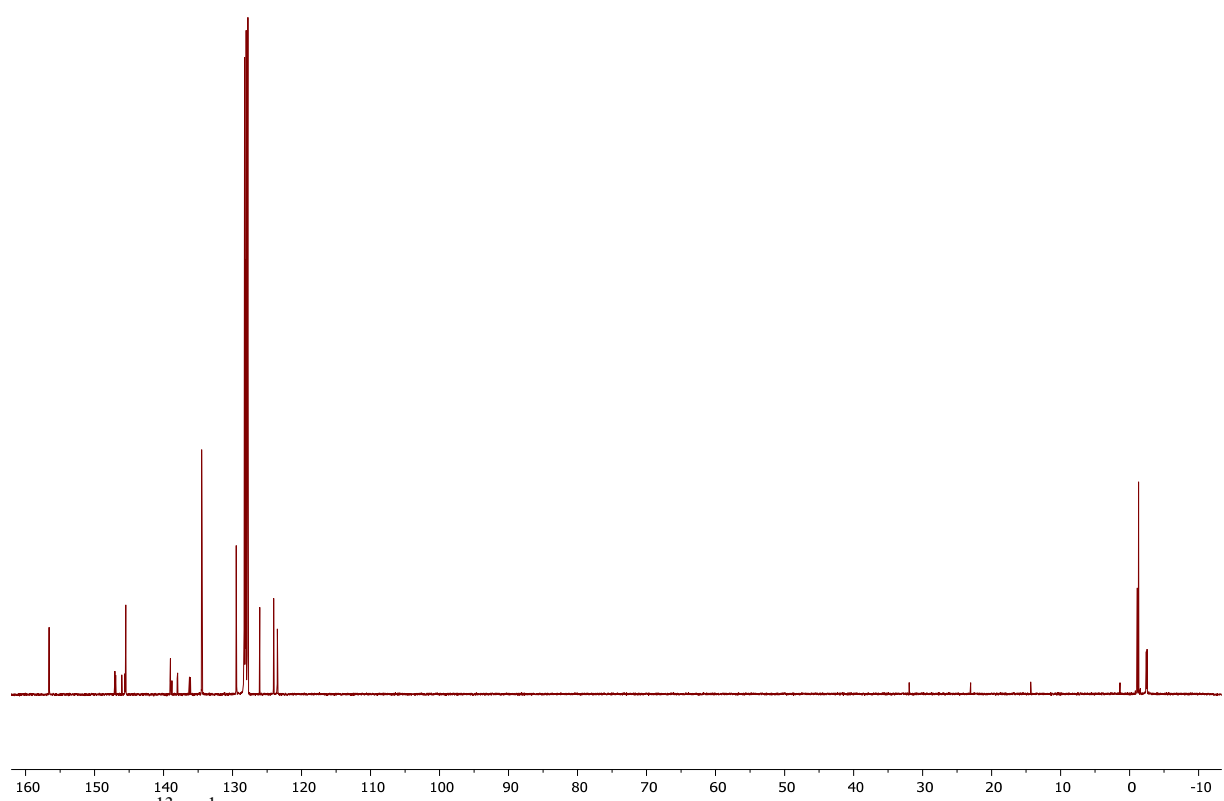

Figure S19:  $^{13}\text{C}\{^1\text{H}\}$ -NMR spectrum of **6** in  $\text{C}_6\text{D}_6$

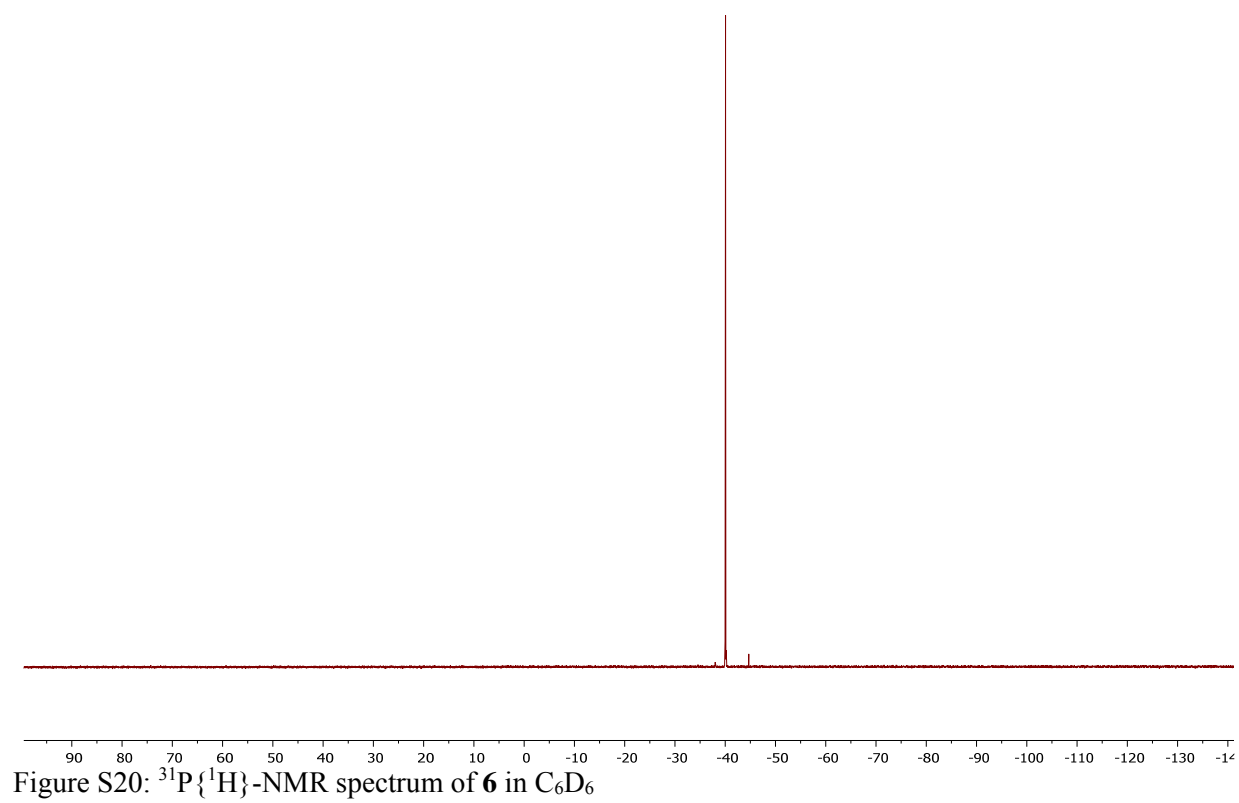



## 2.3 NMR-Spectra of Compound 7

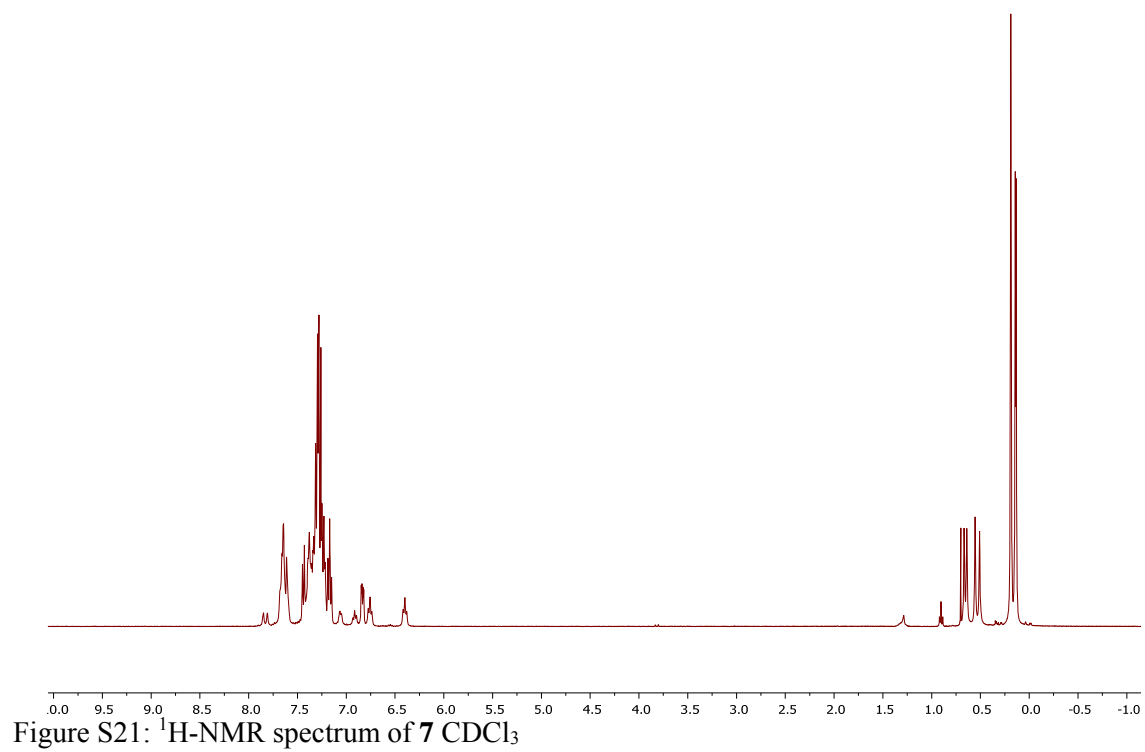

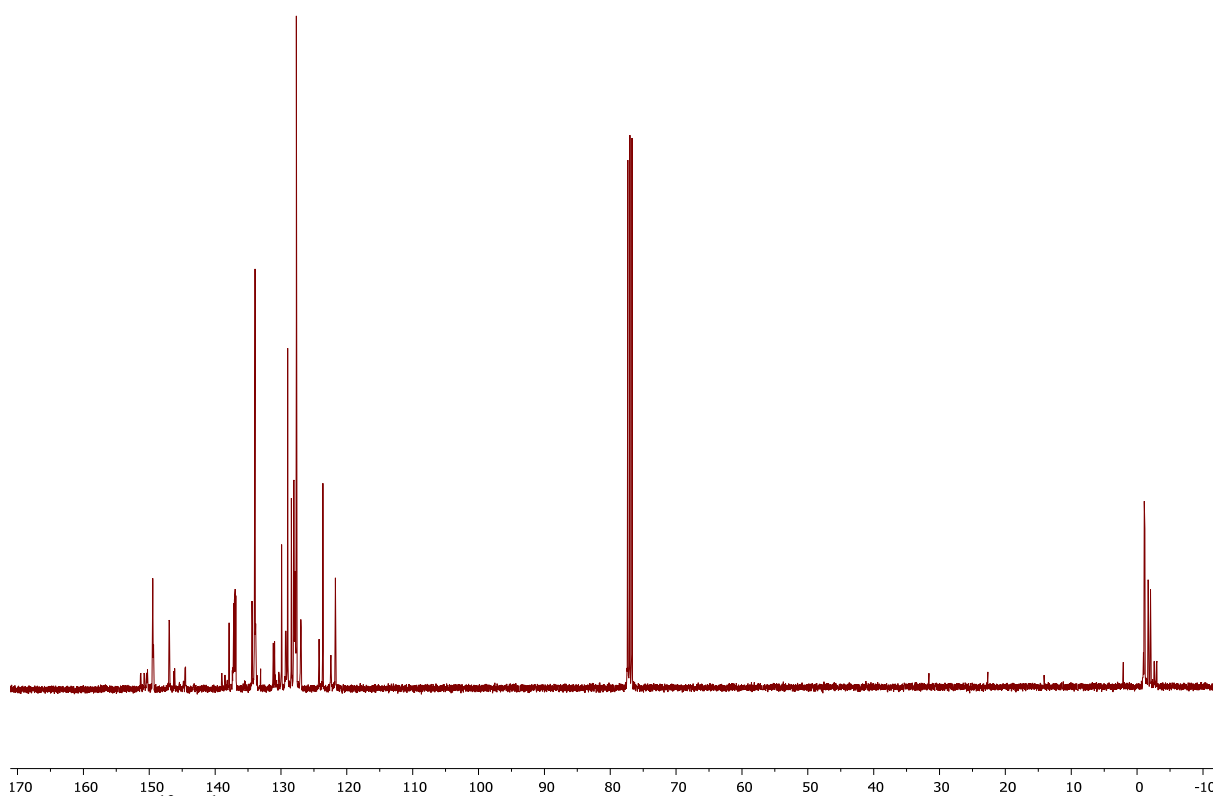

Figure S22:  $^{13}\text{C}\{^1\text{H}\}$ -NMR spectrum of **7** in  $\text{CDCl}_3$

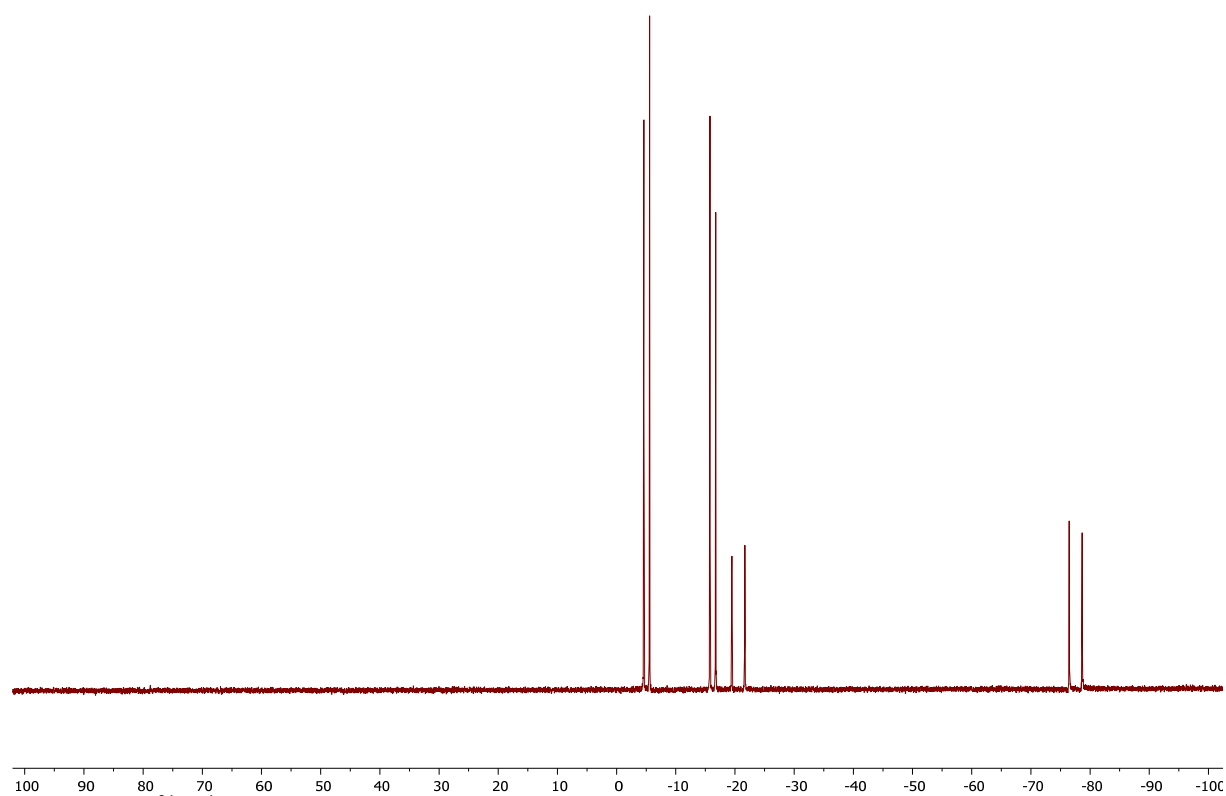

Figure S23:  $^{31}\text{P}\{^1\text{H}\}$ -NMR spectrum of **7** in  $\text{CDCl}_3$

## 2.4 NMR-Spectra of Compound **8**

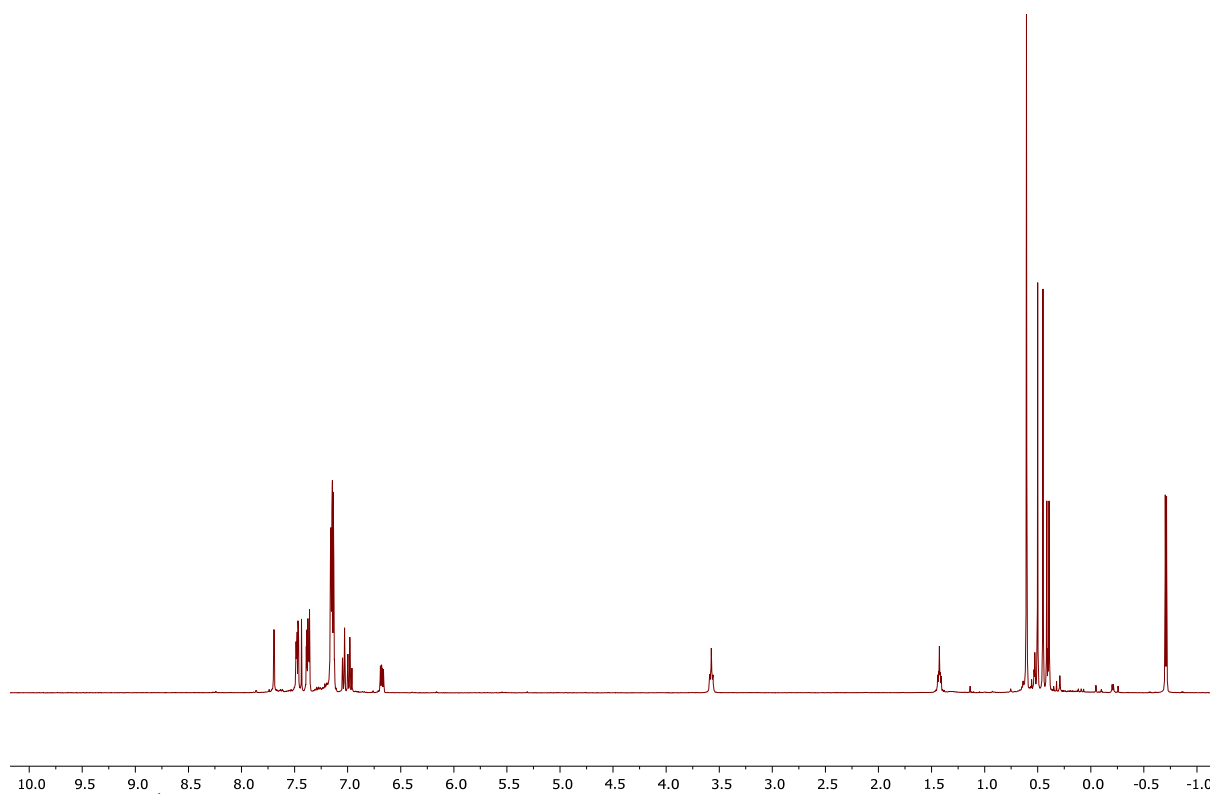

Figure S24:  $^1\text{H}$ -NMR spectrum of **8**  $\text{C}_6\text{D}_6$

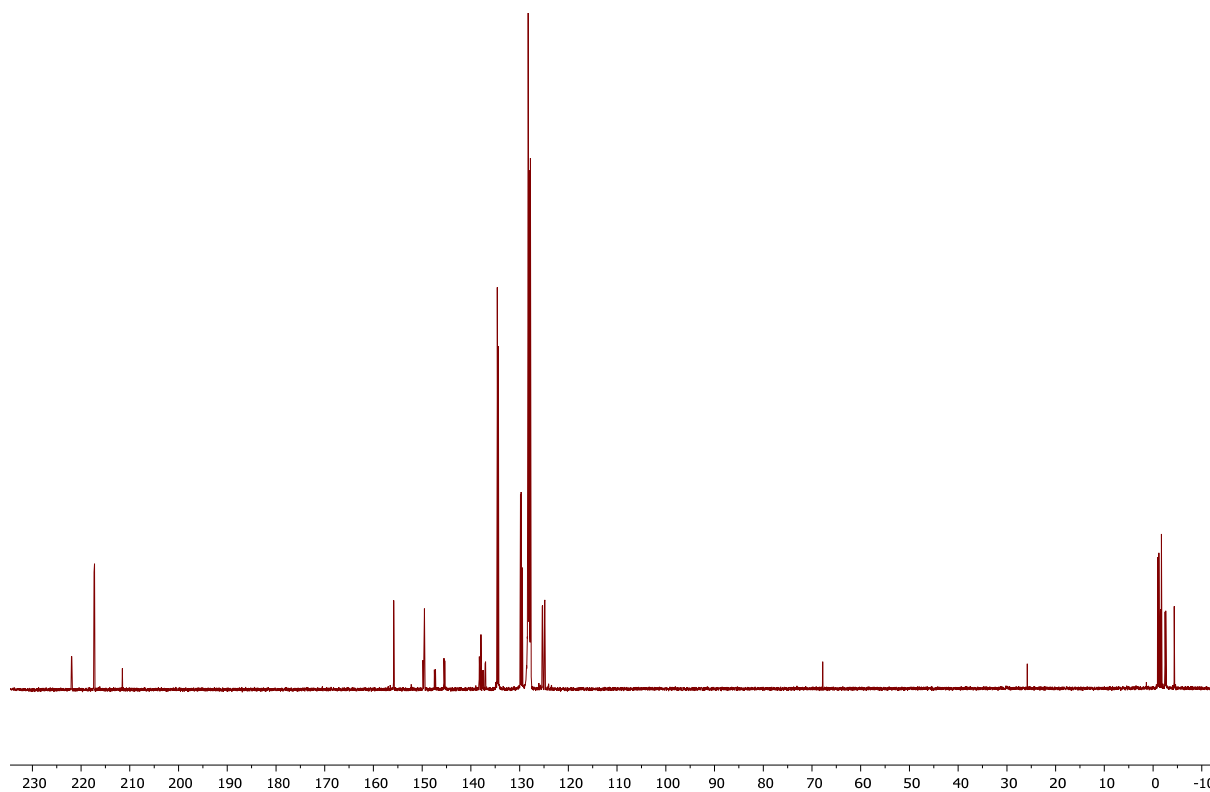

Figure S25:  $^{13}\text{C}\{^1\text{H}\}$ -NMR spectrum of **8** in  $\text{C}_6\text{D}_6$  (211.5 ppm =  $\text{Cr}(\text{CO})_6$ )

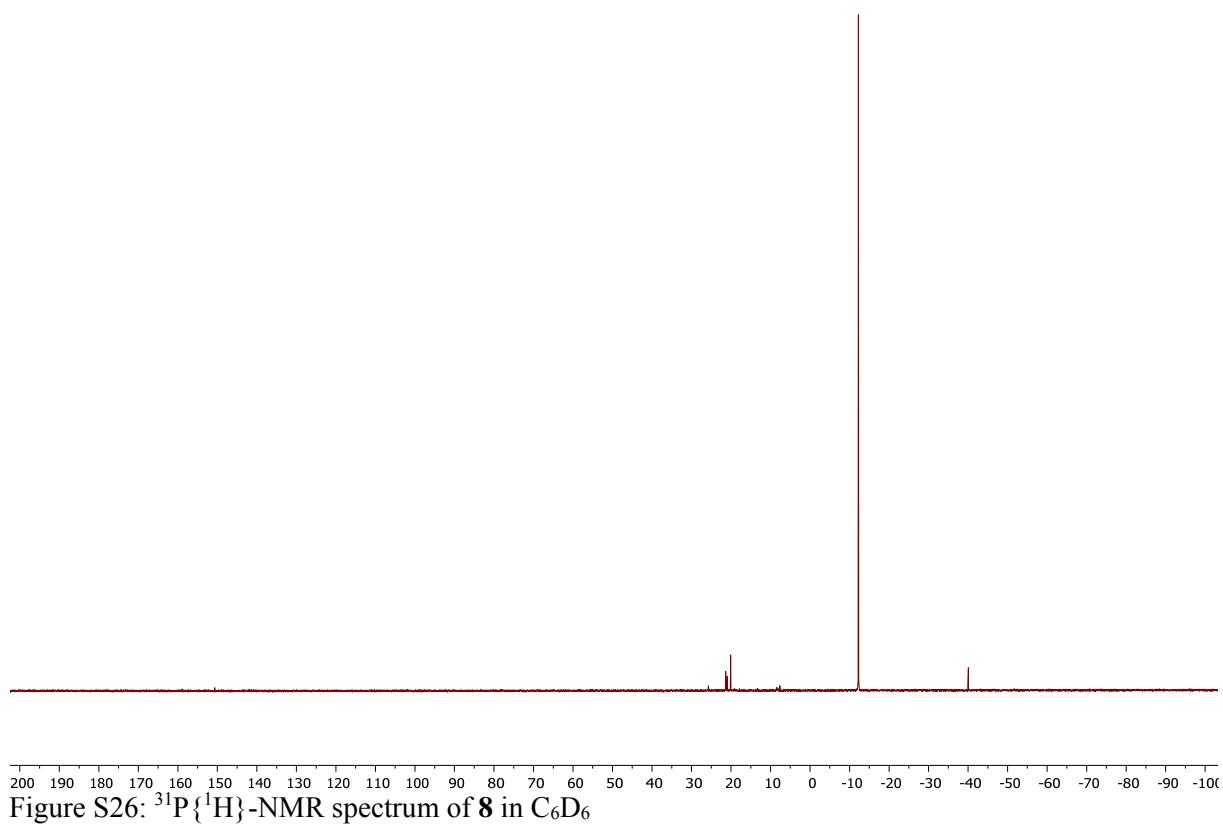

## 2.5 NMR-Spectra of Compound 9

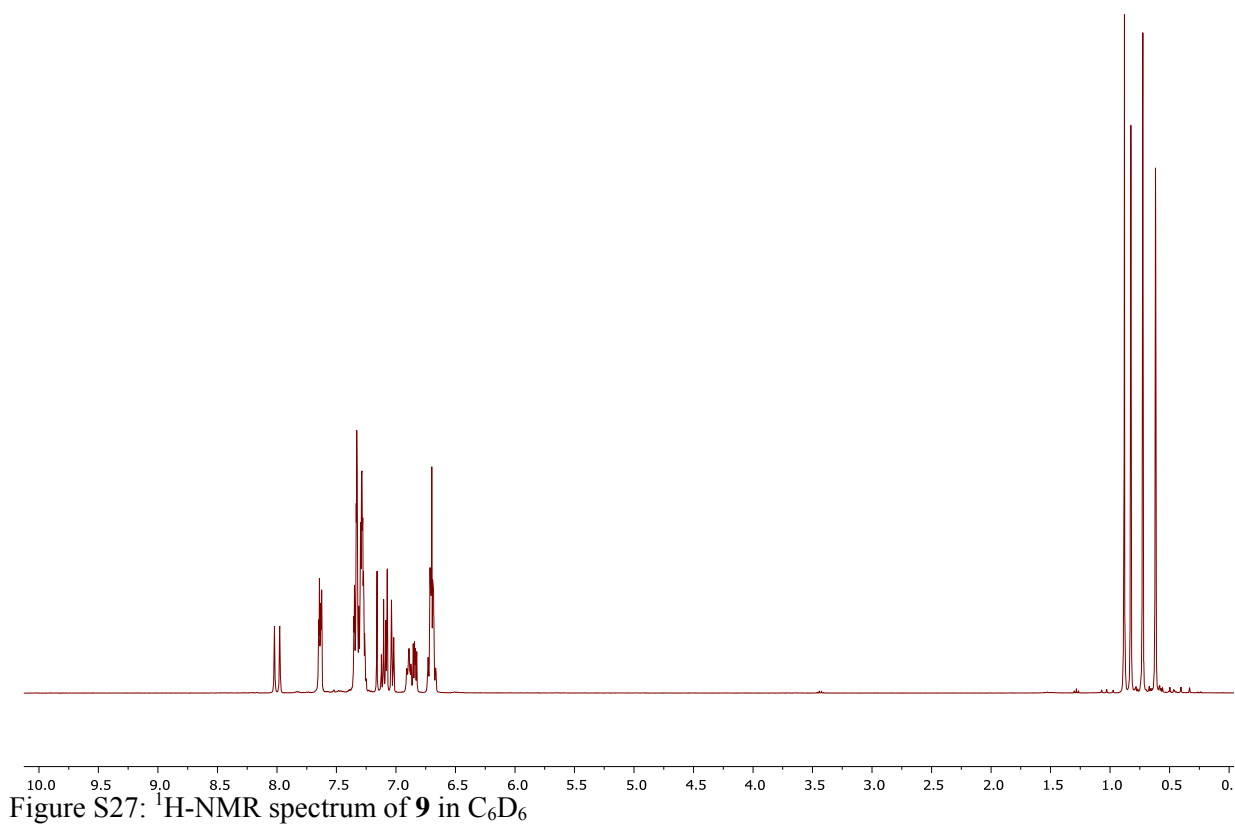

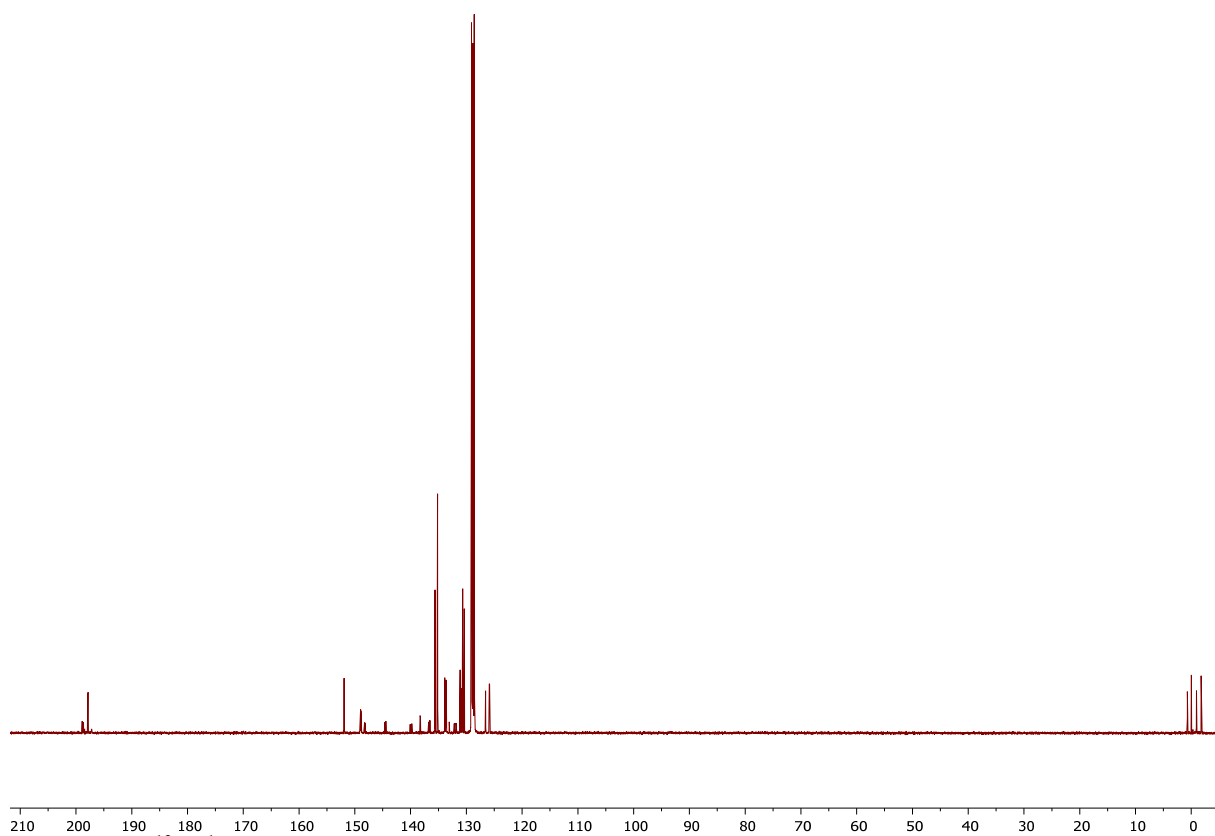

Figure S28:  $^{13}\text{C}\{^1\text{H}\}$ -NMR spectrum of **9** in  $\text{C}_6\text{D}_6$

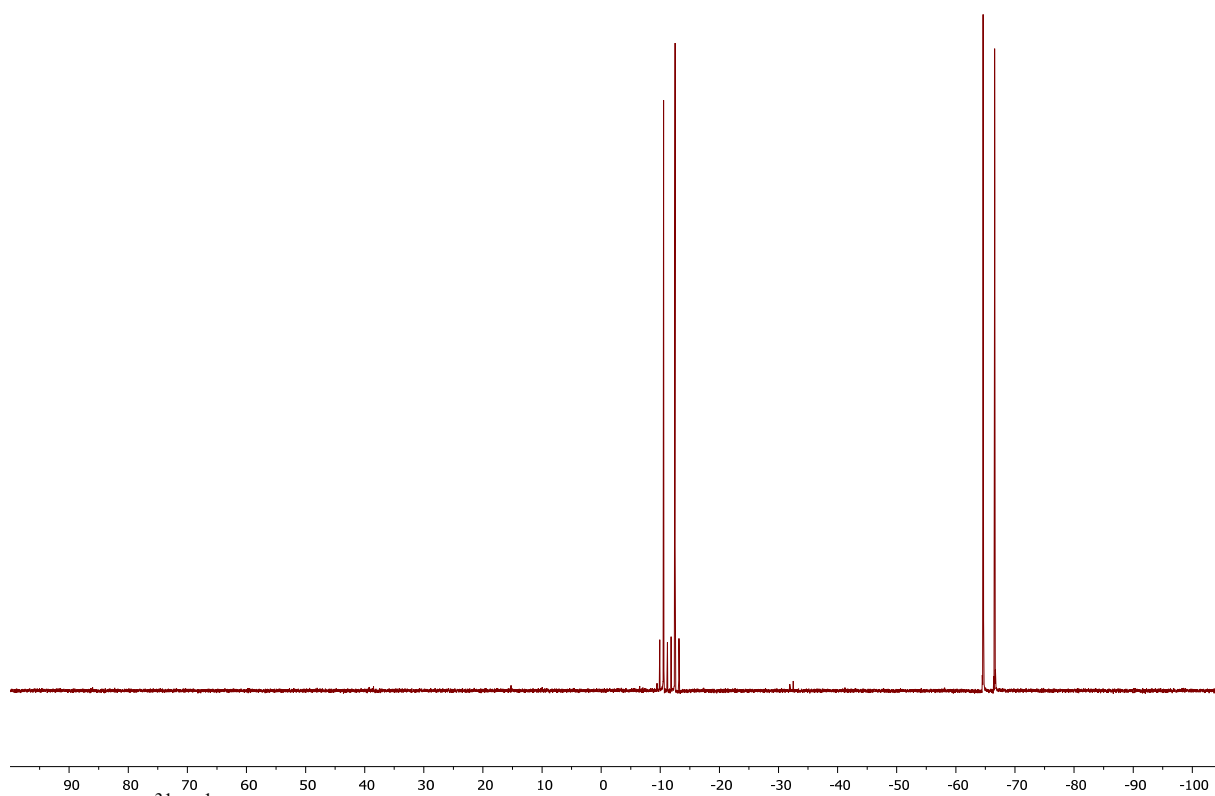

Figure S29:  $^{31}\text{P}\{^1\text{H}\}$ -NMR spectrum of **9** in  $\text{C}_6\text{D}_6$

## 2.6 NMR-Spectra of Compound **10**

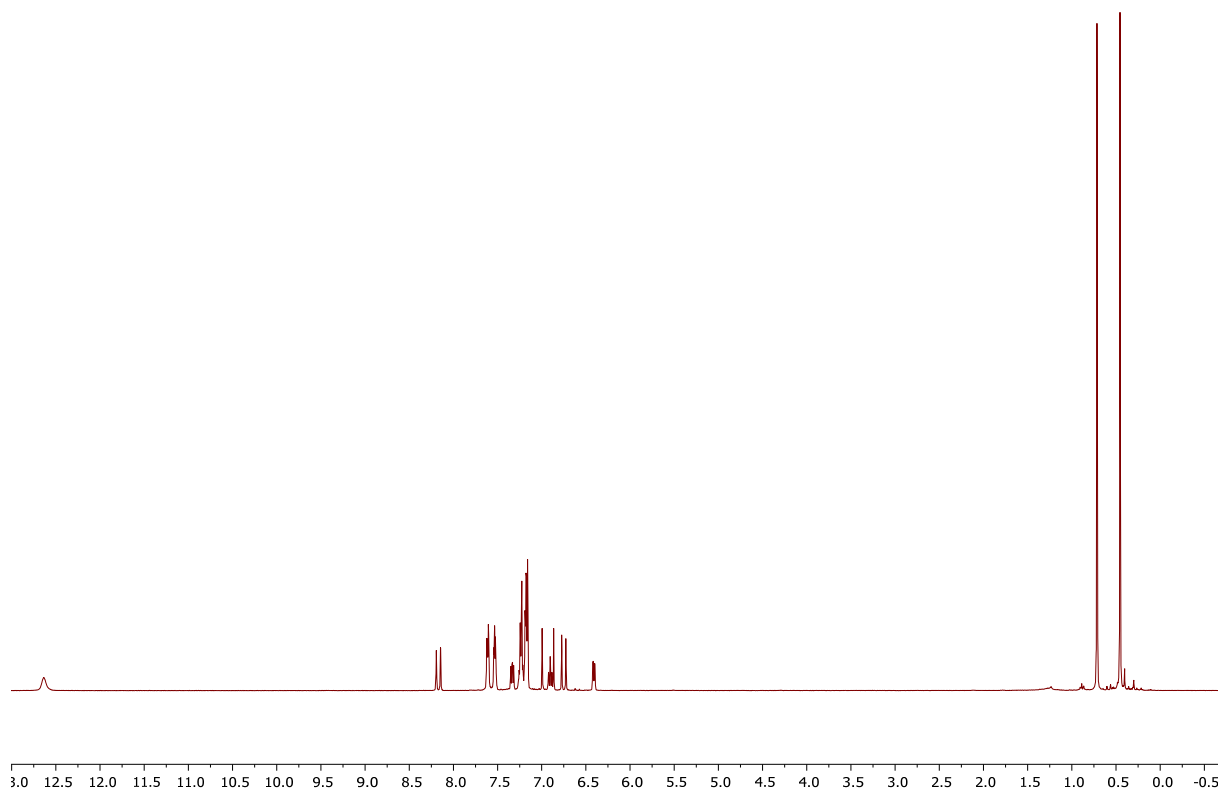

Figure S30:  $^1\text{H}$ -NMR spectrum of **10** in  $\text{C}_6\text{D}_6$

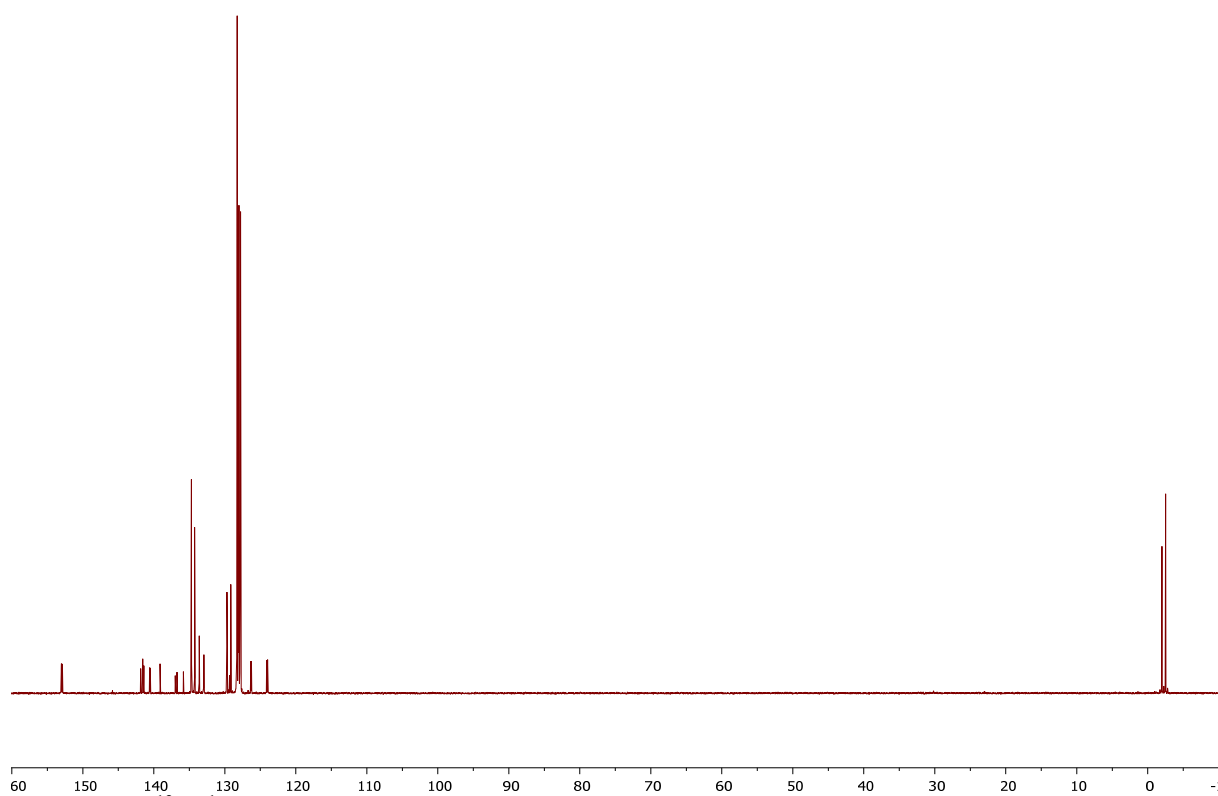

Figure S31:  $^{13}\text{C}\{^1\text{H}\}$ -NMR spectrum of **10** in  $\text{C}_6\text{D}_6$



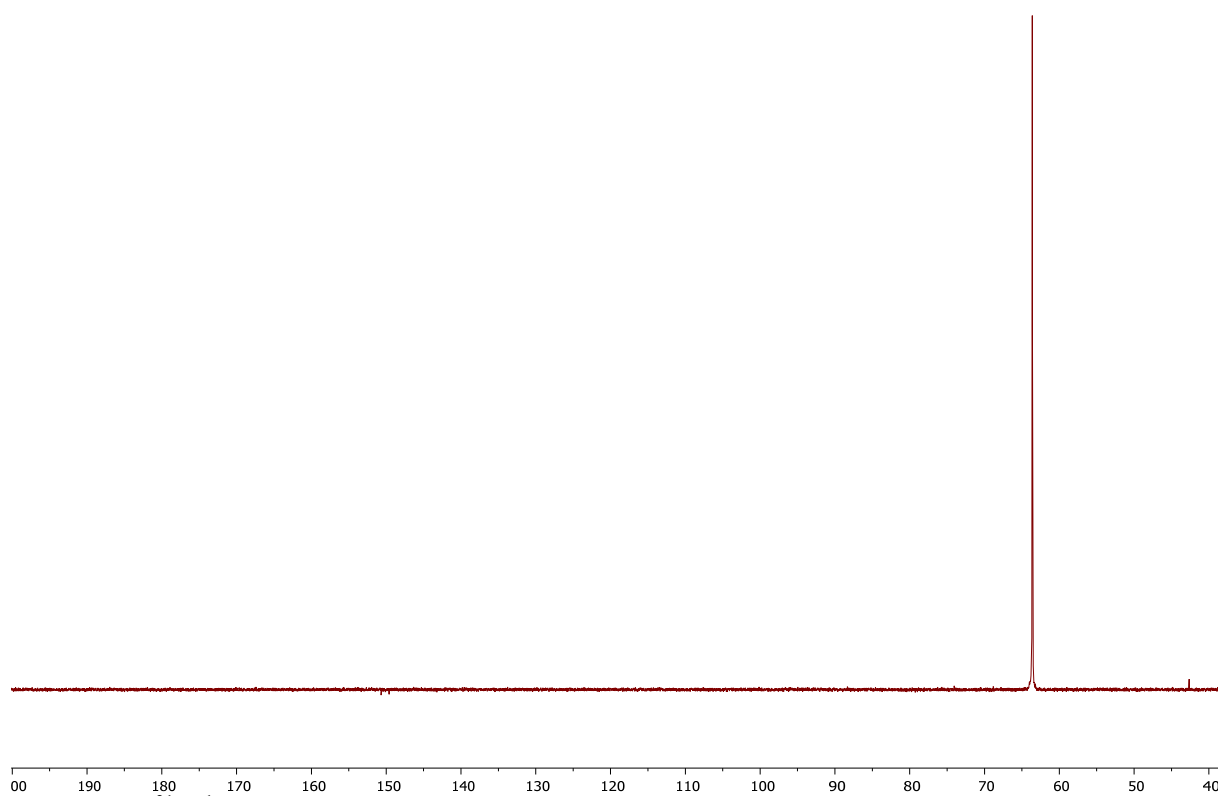

Figure S32:  $^{31}\text{P}\{^1\text{H}\}$ -NMR spectrum of **10** in  $\text{C}_6\text{D}_6$

### 3 Quantum Chemical Calculations

#### 3.1 Optimized Structure of 5 in Gas Phase

!Grid6 FinalGrid7 PBE0 def2-TZVP d3bj opt freq

```
Total enthalpy          ... -1925.76324239 Eh
Total entropy correction ... -0.09088281 Eh  -57.03 kcal/mol
-----
Final Gibbs free enthalpy ... -1925.85412520 Eh
```

56

Coordinates from ORCA-job Input

```
P  9.49489112184651   5.82429782374990   10.76196696745999
C  9.99803782219421   7.50521026447127   11.01496484029531
C 11.10071454022009   5.27635868669592   11.34083684672251
C 11.33019708561039   7.59364214719745   11.54580105337329
C  9.28013296531750   8.70562187869723   10.75144437919929
C 11.93420803894332   6.32485563453546   11.71258317206986
Si 11.57527894340661   3.52080059244557   11.30608727659307
C  7.22188161460727   7.63646464655367   9.84157936284825
C  7.93686106548223   8.72150550023325   10.15036631179401
C 11.90196345274427   8.84858536408239   11.83186705534302
C  9.89282080617129   9.91703619485633   11.04465340670175
H 12.94805687295079   6.21183083377820   12.09574749263300
C 10.24569484778037   2.38958007860984   12.01891893477602
C 13.18448206029211   3.17815173889752   12.24455746281446
C 11.85726030959059   2.89316776754610   9.52923493442899
Si 5.63813081600642   7.35358222591309   9.08410544689554
H  7.60362534047708   9.76523071897335   9.96719036219484
H 12.91091084589129   8.89788053735327   12.23823211880419
C 11.18691071676219   9.99808889292983   11.58525898440296
H  9.33941329550575   10.83034756343723   10.83158999591780
```

|   |                   |                   |                   |
|---|-------------------|-------------------|-------------------|
| H | 10.11614901667215 | 2.58225458816140  | 13.08776677595352 |
| H | 10.48105153956784 | 1.32999192067866  | 11.87317934510553 |
| H | 9.29575191101555  | 2.61267597430854  | 11.52620897845276 |
| H | 14.00658812989892 | 3.75819440000317  | 11.81682083468862 |
| H | 13.46309554460172 | 2.11977782570615  | 12.22055822030753 |
| H | 13.07059473294656 | 3.47735866796819  | 13.29044909072272 |
| C | 12.54217703143715 | 1.70694845614886  | 9.25564190014157  |
| C | 11.33742091847746 | 3.60237115478615  | 8.44323791798845  |
| C | 4.55248140289981  | 8.70644708638051  | 8.23837950193830  |
| C | 4.43606619567036  | 6.55762275869453  | 10.32446546142365 |
| C | 5.90473384020914  | 6.05535977776603  | 7.70923388444787  |
| H | 11.62327566096245 | 10.97182107663217 | 11.79937453011884 |
| H | 12.96155256739978 | 1.12831999138915  | 10.07540185766010 |
| C | 12.70516057934707 | 1.24049939928088  | 7.95760115990405  |
| C | 11.48924554883234 | 3.13994875059123  | 7.14263419961244  |
| H | 10.79566944939672 | 4.52633003696935  | 8.64047287157433  |
| H | 4.33811247866111  | 9.49908014670319  | 8.96368949083261  |
| H | 3.59093260732460  | 8.33037958698613  | 7.86378139827399  |
| H | 5.08945658569409  | 9.16116798947785  | 7.39982689481427  |
| H | 4.93959406381000  | 5.73314826529736  | 10.83440726480745 |
| H | 3.53544840536884  | 6.17403525613616  | 9.83190182072900  |
| H | 4.13221576471298  | 7.28900445204866  | 11.08087572203000 |
| C | 7.06735688794342  | 5.27574372136411  | 7.74013084455514  |
| C | 4.99612559080160  | 5.81250357593911  | 6.67600852460614  |
| H | 13.24391191334314 | 0.31466573763147  | 7.77461106969255  |
| C | 12.17453004909662 | 1.95838478834490  | 6.89429742265137  |
| H | 11.06606040843438 | 3.70804980587180  | 6.31990518296556  |
| H | 7.78165336159736  | 5.45797020538349  | 8.54225293673938  |
| C | 7.30682272377130  | 4.30168155351086  | 6.77953332704264  |
| C | 5.22723457975963  | 4.83847304948150  | 5.71142109208389  |
| H | 4.08431908010419  | 6.40214124276500  | 6.61699246509082  |

|   |                   |                  |                  |
|---|-------------------|------------------|------------------|
| H | 12.29349299124239 | 1.59690877928165 | 5.87706434875031 |
| H | 8.21711081342762  | 3.71105773098991 | 6.83204689210212 |
| C | 6.38735416372100  | 4.07688801859260 | 5.76182709352960 |
| H | 4.50209898701722  | 4.67341818802724 | 4.91796444586533 |
| H | 6.57402191303320  | 3.31304694974515 | 5.01166882752938 |

### 3.2 Structure of 5 with Dummy Atom for NICS(0) Calculation

|    |         |          |          |
|----|---------|----------|----------|
| P  | 6.02801 | 4.24972  | 8.85059  |
| C  | 6.53116 | 5.93063  | 9.10358  |
| C  | 7.63383 | 3.70178  | 9.42946  |
| C  | 7.86332 | 6.01906  | 9.63442  |
| C  | 5.81325 | 7.13104  | 8.84006  |
| C  | 8.46733 | 4.75028  | 9.80120  |
| Si | 8.10840 | 1.94622  | 9.39471  |
| C  | 3.75500 | 6.06188  | 7.93020  |
| C  | 4.46998 | 7.14693  | 8.23899  |
| C  | 8.43508 | 7.27401  | 9.92049  |
| C  | 6.42594 | 8.34246  | 9.13327  |
| H  | 9.48118 | 4.63725  | 10.18437 |
| C  | 6.77881 | 0.81500  | 10.10754 |
| C  | 9.71760 | 1.60357  | 10.33318 |
| C  | 8.39038 | 1.31859  | 7.61785  |
| Si | 2.17125 | 5.77900  | 7.17273  |
| H  | 4.13675 | 8.19065  | 8.05581  |
| H  | 9.44403 | 7.32330  | 10.32685 |
| C  | 7.72003 | 8.42351  | 9.67388  |
| H  | 5.87253 | 9.25577  | 8.92021  |
| H  | 6.64927 | 1.00767  | 11.17639 |
| H  | 7.01417 | -0.24459 | 9.96180  |
| H  | 5.82887 | 1.03810  | 9.61483  |

|   |          |          |          |
|---|----------|----------|----------|
| H | 10.53971 | 2.18361  | 9.90544  |
| H | 9.99622  | 0.54520  | 10.30918 |
| H | 9.60371  | 1.90278  | 11.37907 |
| C | 9.07530  | 0.13237  | 7.34426  |
| C | 7.87054  | 2.02779  | 6.53186  |
| C | 1.08560  | 7.13187  | 6.32700  |
| C | 0.96919  | 4.98304  | 8.41309  |
| C | 2.43785  | 4.48078  | 5.79785  |
| H | 8.15640  | 9.39724  | 9.88799  |
| H | 9.49467  | -0.44626 | 8.16402  |
| C | 9.23828  | -0.33408 | 6.04622  |
| C | 8.02237  | 1.56537  | 5.23125  |
| H | 7.32879  | 2.95175  | 6.72909  |
| H | 0.87123  | 7.92450  | 7.05231  |
| H | 0.12405  | 6.75580  | 5.95240  |
| H | 1.62258  | 7.58659  | 5.48845  |
| H | 1.47271  | 4.15857  | 8.92303  |
| H | 0.06857  | 4.59946  | 7.92052  |
| H | 0.66534  | 5.71442  | 9.16950  |
| C | 3.60048  | 3.70116  | 5.82875  |
| C | 1.52925  | 4.23792  | 4.76463  |
| H | 9.77703  | -1.25991 | 5.86323  |
| C | 8.70765  | 0.38380  | 4.98292  |
| H | 7.59918  | 2.13347  | 4.40853  |
| H | 4.31477  | 3.88339  | 6.63087  |
| C | 3.83994  | 2.72710  | 4.86815  |
| C | 1.76035  | 3.26389  | 3.80004  |
| H | 0.61744  | 4.82756  | 4.70561  |
| H | 8.82661  | 0.02233  | 3.96568  |
| H | 4.75023  | 2.13648  | 4.92067  |
| C | 2.92047  | 2.50231  | 3.85045  |

|    |         |         |         |
|----|---------|---------|---------|
| H  | 1.03522 | 3.09884 | 3.00658 |
| H  | 3.10714 | 1.73847 | 3.10029 |
| DA | 7.24630 | 4.90410 | 9.34036 |

### 3.3 Optimized Structure of 7 (S,R) with Solvent-Correction

!Grid7 NoFinalgrid PBE0 def2-TZVP d3bj CPCM(Chloroform) tightopt verytightscf numfreq normalprint

|                           |     |                                |
|---------------------------|-----|--------------------------------|
| Total enthalpy            | ... | -2498.47281911 Eh              |
| Total entropy correction  | ... | -0.10154194 Eh -63.72 kcal/mol |
| -----                     |     |                                |
| Final Gibbs free enthalpy | ... | -2498.57436105 Eh              |

68

Coordinates from ORCA-job Input

|    |                   |                   |                  |
|----|-------------------|-------------------|------------------|
| P  | 0.53707710391846  | 7.24836368361299  | 5.64516980009804 |
| P  | 1.92977539520189  | 8.92634757761354  | 5.85820173471791 |
| C  | 1.84166512864063  | 6.22165832192701  | 4.97216186095459 |
| C  | 0.47687267357810  | 6.22790528435134  | 7.13619664498095 |
| C  | 2.31409843171028  | 9.00298424648067  | 4.05766689083700 |
| C  | 1.97803033246095  | 5.04181059219980  | 5.71061511966885 |
| C  | 2.66061808575330  | 6.53293728292888  | 3.89407625601186 |
| Si | -0.56969380868668 | 6.65739013262125  | 8.61980654147862 |
| C  | 1.17600913121717  | 5.08049732565286  | 6.92117398098502 |
| C  | 2.65340450680753  | 7.89543324744385  | 3.36130044524659 |
| Si | 2.62596795410298  | 10.69000716449204 | 3.25952304120720 |
| C  | 2.87233790533232  | 4.06671470079678  | 5.25938303609998 |
| C  | 3.54834335552597  | 5.54995115294734  | 3.46008882727105 |
| C  | -0.72287788281576 | 5.12644273582571  | 9.69157961469667 |
| C  | -2.25149161607122 | 7.22446559303237  | 8.02947506029772 |
| C  | 0.27014718236262  | 8.04037975604470  | 9.55624891485197 |
| H  | 1.15849498005189  | 4.24307380564818  | 7.61380383860227 |



|   |                   |                   |                   |
|---|-------------------|-------------------|-------------------|
| H | 3.04454319645748  | 8.01314865834126  | 2.35299875907686  |
| C | 3.58113639342012  | 10.37636025110172 | 1.67192449043012  |
| C | 3.68244442276745  | 11.71513120639564 | 4.41454642660357  |
| C | 1.05010829573672  | 11.60220147631699 | 2.83809741826955  |
| H | 2.98941580690282  | 3.13227163700990  | 5.79714005496530  |
| C | 3.62881908130856  | 4.32516327607014  | 4.12556835047634  |
| H | 4.20510531273298  | 5.75227345263850  | 2.62045174451081  |
| C | -0.14188176795077 | 5.05009418141122  | 10.95874357760158 |
| C | -1.42011100726446 | 4.00820268429402  | 9.22358685179313  |
| H | -2.87634276677124 | 7.51452164611354  | 8.87827525090939  |
| H | -2.76537118251036 | 6.43483185845817  | 7.47607203215137  |
| H | -2.15070128367429 | 8.08999429012424  | 7.36793466970377  |
| H | -0.30252986677472 | 8.31540055547111  | 10.44613721370775 |
| H | 0.34706590451694  | 8.92574717652790  | 8.91865492970958  |
| H | 1.28003690359587  | 7.75993637096716  | 9.86454544160784  |
| C | 4.95184012786412  | 10.10369252577521 | 1.70483855395743  |
| C | 2.94840981820350  | 10.38382066333538 | 0.42711127171185  |
| H | 3.14016915801873  | 11.96342504948832 | 5.32910312039567  |
| H | 3.96199917647725  | 12.65018286410711 | 3.92128932286567  |
| H | 4.59745275335699  | 11.18808152582905 | 4.69477561580686  |
| H | 0.55502717285852  | 11.96436534147471 | 3.73983691763861  |
| H | 0.34601739028791  | 10.96511870260951 | 2.29784905440275  |
| H | 1.29009772829232  | 12.46293361369229 | 2.20723763137285  |
| H | 4.32664799737072  | 3.57622018692879  | 3.76850320189999  |
| H | 0.40754099671489  | 5.89896440971862  | 11.35294725312894 |
| C | -0.25211797819587 | 3.90193175046339  | 11.73301765977782 |
| H | -1.88108526246934 | 4.03196287492852  | 8.24025524725301  |
| C | -1.53414305208891 | 2.85815920091577  | 9.99060794571195  |
| H | 5.47604356414221  | 10.08466109879281 | 2.65551425655877  |
| C | 5.66431441355527  | 9.84996036379618  | 0.54191325656531  |
| H | 1.88497279374630  | 10.59115482453376 | 0.36324386693958  |

|   |                   |                   |                   |
|---|-------------------|-------------------|-------------------|
| C | 3.65411310676534  | 10.12898047876270 | -0.74182433015561 |
| H | 0.20687231024247  | 3.86469975000677  | 12.71495127645886 |
| C | -0.94888209203165 | 2.80373191800992  | 11.24947633587664 |
| H | -2.07956962917759 | 2.00251894245199  | 9.60771140409111  |
| C | 5.01461585098892  | 9.86157180671750  | -0.68584881026159 |
| H | 6.72775120785735  | 9.64293598569877  | 0.59175493195552  |
| H | 3.14136652617238  | 10.13984653171909 | -1.69744086296490 |
| H | -1.03630164147507 | 1.90611394346102  | 11.85157942447958 |
| H | 5.56874857607415  | 9.66351281976208  | -1.59666641250433 |
| C | 0.74165652865279  | 10.29036580136831 | 6.15711855064408  |
| C | 1.11596806488714  | 11.26297801148730 | 7.08257036070015  |
| C | -0.52380636239320 | 10.36452309595594 | 5.57558334308339  |
| C | 0.25171260511191  | 12.29969333192564 | 7.40932608371631  |
| H | 2.09149450831707  | 11.20381511876416 | 7.55445392969034  |
| C | -1.00239237797386 | 12.36582393529859 | 6.82105282051030  |
| H | 0.55741468641940  | 13.05036379167333 | 8.12914876346967  |
| C | -1.38955101098136 | 11.39427928219346 | 5.90530884563435  |
| H | -0.83280979603401 | 9.61119003589755  | 4.85951228765844  |
| H | -2.36994341066610 | 11.44136284734895 | 5.44474113326263  |
| H | -1.68190575047422 | 13.17036025024670 | 7.07847192914473  |

### 3.4 Optimized Structure of 7 (S,S) with Solvent-Correction

!Grid5 FinalGrid6 PBE0 def2-TZVP d3bj CPCM(Chloroform) tightopt numfreq normalprint

|                           |     |                                |
|---------------------------|-----|--------------------------------|
| Total enthalpy            | ... | -2498.47645196 Eh              |
| Total entropy correction  | ... | -0.10043130 Eh -63.02 kcal/mol |
| -----                     |     |                                |
| Final Gibbs free enthalpy | ... | -2498.57688326 Eh              |

Coordinates from ORCA-job Input

|    |                   |                   |                   |
|----|-------------------|-------------------|-------------------|
| P  | 0.15013060884002  | 7.08422699775960  | 5.68009265306768  |
| P  | 1.73201554625871  | 8.40733112103678  | 6.47223010469050  |
| C  | 1.22186148375471  | 6.16930284430282  | 4.59187103670539  |
| C  | -0.16270681077340 | 5.59806859753781  | 6.66732080862156  |
| C  | 2.32537699714715  | 8.92170239199035  | 4.80132623984722  |
| C  | 1.14358878765612  | 4.79422434805576  | 4.83649176135885  |
| C  | 2.10439642771597  | 6.71043924987689  | 3.66578665242080  |
| Si | -1.27605810139954 | 5.52971397459531  | 8.16504838821932  |
| C  | 0.33444542111167  | 4.51570322696540  | 6.00904294660553  |
| C  | 2.40134250698535  | 8.13780900949395  | 3.70529235567168  |
| Si | 2.93386909442583  | 10.69976271372889 | 4.77611398005635  |
| C  | 1.86033818965634  | 3.92141316597909  | 4.01697474461520  |
| C  | 2.80558769932432  | 5.82409709605867  | 2.84772541192963  |
| C  | -0.46767069104528 | 6.53855089074499  | 9.52676819002356  |
| C  | -1.47276866402405 | 3.75324619262517  | 8.70526627317646  |
| C  | -2.92659545541685 | 6.29323608471953  | 7.73024877504586  |
| H  | 0.14599276750704  | 3.49445590268390  | 6.32934944588689  |
| H  | 2.82599602906619  | 8.56269097019508  | 2.79627098860902  |
| C  | 3.80778634878501  | 10.99960805665356 | 3.14304761875223  |
| C  | 4.13891806079057  | 10.91430630745289 | 6.19237238737449  |
| C  | 1.48351384304984  | 11.86132858038968 | 4.97210768046261  |
| H  | 1.80499034055544  | 2.84889646171574  | 4.16916586500777  |
| C  | 2.66310157073667  | 4.44736313353091  | 3.01279157421742  |
| H  | 3.49942655183855  | 6.21124146884599  | 2.10863375888843  |
| C  | -0.47265061024915 | 7.93509250861629  | 9.47179046680399  |
| C  | 0.22337447935531  | 5.92966787224467  | 10.57680724167163 |
| H  | -2.08167896010779 | 3.69863120770336  | 9.61154307312172  |
| H  | -0.50940887387648 | 3.28108042902427  | 8.91245706447914  |
| H  | -1.97353882551468 | 3.17354135933756  | 7.92559293515765  |
| H  | -3.59171640183027 | 6.28887599358544  | 8.59788578247195  |

|   |                   |                   |                   |
|---|-------------------|-------------------|-------------------|
| H | -3.40365424705478 | 5.73152145148837  | 6.92295781550884  |
| H | -2.80966386768611 | 7.32680220885511  | 7.39465751431316  |
| C | 5.05601949270445  | 10.42002432955619 | 2.89467953256361  |
| C | 3.23417922908042  | 11.77079062651455 | 2.13022785629843  |
| H | 3.66119643689496  | 10.68569672589382 | 7.14891939871728  |
| H | 4.49414765743265  | 11.94764250549840 | 6.22833972907215  |
| H | 5.00448496721227  | 10.25677437968812 | 6.08252052553368  |
| H | 0.97533398128939  | 11.65952231740372 | 5.91870020477006  |
| H | 0.75785168945686  | 11.73174912442401 | 4.16564500071522  |
| H | 1.81571539762795  | 12.90297636428621 | 4.97733432938101  |
| H | 3.22125637948890  | 3.77673074622435  | 2.36945746070231  |
| H | -0.99646195476455 | 8.44565307793997  | 8.66934354670815  |
| C | 0.19686055549498  | 8.69589729096566  | 10.41970559200103 |
| H | 0.25242530214047  | 4.84724024375531  | 10.64885747634072 |
| C | 0.89171680606879  | 6.68378889476310  | 11.53178139883204 |
| H | 5.53071852193236  | 9.81078699437159  | 3.65840775270855  |
| C | 5.70725881703160  | 10.60268028979040 | 1.68371409990773  |
| H | 2.26595215806595  | 12.23501883070401 | 2.28774040181215  |
| C | 3.88046053868955  | 11.95941009377280 | 0.91516275801369  |
| H | 0.18880313163877  | 9.77788800650073  | 10.34948127635370 |
| C | 0.88312605490354  | 8.06989778269686  | 11.45178556273772 |
| H | 1.42562218247269  | 6.18965506588324  | 12.33614933142342 |
| C | 5.11860390081450  | 11.37472927921784 | 0.69004467855348  |
| H | 6.67496273171607  | 10.14362719269747 | 1.51345683147065  |
| H | 3.41651093851302  | 12.56328642947529 | 0.14297891681402  |
| H | 1.41102047942101  | 8.66124091566193  | 12.19157524136766 |
| H | 5.62516174952806  | 11.51988126224319 | -0.25767756906790 |
| C | 3.05825677541393  | 7.29108034947845  | 7.05091144599662  |
| C | 2.93704741893930  | 6.81454449476320  | 8.35792006065144  |
| C | 4.16922078231762  | 6.91890102751932  | 6.29690170531827  |
| C | 3.89298407668285  | 5.96487954007560  | 8.88995700752043  |

|   |                  |                  |                  |
|---|------------------|------------------|------------------|
| H | 2.08559899498371 | 7.10856039892438 | 8.96044655796168 |
| C | 4.99600249814439 | 5.59524786951299 | 8.13054503055063 |
| H | 3.77860682434691 | 5.59742034977956 | 9.90382129122767 |
| C | 5.13302241587252 | 6.07903606147858 | 6.83683132209207 |
| H | 4.28357804572722 | 7.28606673143544 | 5.28537710500309 |
| H | 5.99360560601824 | 5.79817833893279 | 6.23969843640979 |
| H | 5.74905817111613 | 4.93624425037693 | 8.54785716875520 |

### 3.5 Optimized Structure of Phosphoric Acid as Reference for NMR Calculations

!Grid5 FinalGrid6 PBE0 def2-TZVP CPCM(Chloroform) d3bj tightopt verytightscf numfreq

|                          |     |                  |                 |
|--------------------------|-----|------------------|-----------------|
| Total enthalpy           | ... | -643.86969595 Eh |                 |
| Total entropy correction | ... | -0.03619163 Eh   | -22.71 kcal/mol |
| -----                    |     |                  |                 |
| Final Gibbs free energy  | ... | -643.90588758 Eh |                 |

8

Coordinates from ORCA-job Input

|   |                   |                   |                   |
|---|-------------------|-------------------|-------------------|
| P | -4.69063350796895 | 0.49877921247310  | 0.11272864873468  |
| O | -3.30888648012770 | 0.41668861383740  | 0.86578249507568  |
| O | -4.61732288364226 | -0.74848122551954 | -0.85217256151414 |
| O | -4.60004488459736 | 1.70920714709684  | -0.90891543168871 |
| H | -4.90711125267117 | 2.54032512028118  | -0.52524640184670 |
| H | -2.53282255636921 | 0.44290985413306  | 0.29234482338187  |
| H | -5.42766505354080 | -0.89620081784504 | -1.35588247685023 |
| O | -5.81269338108252 | 0.56370209554300  | 1.04942090470754  |

### 3.6 Optimized Structure of 7 (S,R) in Gas Phase

!Grid6 FinalGrid7 PBE0 def2-TZVP d3bj tightopt numfreq

```
Total enthalpy          ... -2498.45825960 Eh
Total entropy correction ... -0.10119126 Eh  -63.50 kcal/mol
-----
Final Gibbs free enthalpy ... -2498.55945086 Eh
```

68

Coordinates from ORCA-job Input

|    |                   |                   |                  |
|----|-------------------|-------------------|------------------|
| P  | 0.53132088138187  | 7.25974055893180  | 5.67010675381841 |
| P  | 1.93395398970768  | 8.93742209269745  | 5.83826615463572 |
| C  | 1.80963474156187  | 6.22611223001559  | 4.95989989541249 |
| C  | 0.51741819246797  | 6.24438664708376  | 7.16473026066693 |
| C  | 2.26140421582495  | 9.00328399869579  | 4.02621448502185 |
| C  | 1.96345440988276  | 5.04679794392264  | 5.69482106480510 |
| C  | 2.59535860020165  | 6.53196969949875  | 3.85652768926448 |
| Si | -0.46275600411243 | 6.68472998500968  | 8.68585816217497 |
| C  | 1.20152034823286  | 5.09224276318846  | 6.92956808110860 |
| C  | 2.57812911050382  | 7.89332116623601  | 3.32346289444374 |
| Si | 2.54809543989602  | 10.67957847042075 | 3.20454930931670 |
| C  | 2.83776428284686  | 4.06791337081739  | 5.21558152754466 |
| C  | 3.46414728506725  | 5.54522934816092  | 3.39670576758541 |
| C  | -0.68448147868334 | 5.13307244624478  | 9.71437529178814 |
| C  | -2.11971347024867 | 7.37822107646926  | 8.16172510639995 |
| C  | 0.47968275426487  | 7.98419290878611  | 9.64677947294237 |
| H  | 1.19823956402641  | 4.25757558745610  | 7.62590395025779 |
| H  | 2.94380011013853  | 8.00942497974062  | 2.30528274512845 |
| C  | 3.58589359436606  | 10.36801137768648 | 1.66942193279189 |
| C  | 3.51099615488820  | 11.78226811574966 | 4.37152626050869 |



|   |                   |                   |                   |
|---|-------------------|-------------------|-------------------|
| C | 0.95846282398782  | 11.52132985593474 | 2.69030527139332  |
| H | 2.96705538341959  | 3.13310778499050  | 5.74975163083734  |
| C | 3.55951065180396  | 4.32131731144705  | 4.05968918539134  |
| H | 4.09605490170596  | 5.74583804917026  | 2.53793916204696  |
| C | -0.15644578244904 | 5.01326939847968  | 11.00005136510730 |
| C | -1.38749370858400 | 4.04287834648747  | 9.19398500587370  |
| H | -2.71089386262993 | 7.66589807540749  | 9.03472557947175  |
| H | -2.69351691343815 | 6.64823182259544  | 7.58640413379630  |
| H | -1.98195860750815 | 8.26514865045565  | 7.53641910648656  |
| H | -0.04939595829194 | 8.26683661165323  | 10.56082688824515 |
| H | 0.59282742494665  | 8.88400887760396  | 9.03592115312324  |
| H | 1.47982466385570  | 7.63715222163764  | 9.91567464950722  |
| C | 4.94090109616329  | 10.04606283699583 | 1.78481627763453  |
| C | 3.03943473879728  | 10.42624565207288 | 0.38703261293684  |
| H | 2.90574503230593  | 12.06957184155642 | 5.23329325052091  |
| H | 3.81400957179183  | 12.69419680524569 | 3.85042984483421  |
| H | 4.41183439304726  | 11.28742099595788 | 4.74136819532248  |
| H | 0.40799991137368  | 11.88089672688720 | 3.56035184455385  |
| H | 0.30435061250042  | 10.84566683666913 | 2.13435091779724  |
| H | 1.18583726022793  | 12.38027001122576 | 2.05269568741416  |
| H | 4.24222254752541  | 3.56871301615809  | 3.68213626021096  |
| H | 0.39756541397077  | 5.83947338633119  | 11.43368665447268 |
| C | -0.32383996729980 | 3.85185552270370  | 11.74173618851857 |
| H | -1.80478691789521 | 4.10033360463098  | 8.19276842285996  |
| C | -1.55864664895857 | 2.87993076071926  | 9.92805096263610  |
| H | 5.39749728899904  | 9.98428287659670  | 2.76802571090214  |
| C | 5.71963044624214  | 9.79408226337315  | 0.66656482454942  |
| H | 1.99041172462265  | 10.67255304399322 | 0.25914902267531  |
| C | 3.81200606878024  | 10.17324541616748 | -0.73836938403730 |
| H | 0.09555116423910  | 3.78093303321283  | 12.73920811442775 |
| C | -1.02589872628408 | 2.78315800534780  | 11.20633047420829 |

|   |                   |                   |                   |
|---|-------------------|-------------------|-------------------|
| H | -2.10796196505574 | 2.04660816654455  | 9.50415226495824  |
| C | 5.15442477410030  | 9.85680561654138  | -0.59989880417626 |
| H | 6.76950884857173  | 9.54811396214583  | 0.78109224900289  |
| H | 3.36471730787168  | 10.22350782857402 | -1.72489392125908 |
| H | -1.15785702710663 | 1.87466782072136  | 11.78316185439493 |
| H | 5.76075738984208  | 9.65946727475026  | -1.47675050801158 |
| C | 0.72899150546548  | 10.28870884679003 | 6.14602467449295  |
| C | 1.07068266306451  | 11.23160864573178 | 7.11316371086657  |
| C | -0.52156256725931 | 10.37642675414785 | 5.53543328443619  |
| C | 0.19063540563004  | 12.24918382302937 | 7.45512068621044  |
| H | 2.03626670385838  | 11.16062431130531 | 7.60357523549342  |
| C | -1.04663781017541 | 12.32954409045836 | 6.83607660915961  |
| H | 0.47115405215161  | 12.97497174852024 | 8.20974607948357  |
| C | -1.40169001398888 | 11.38964872699120 | 5.87654752814724  |
| H | -0.80653564175919 | 9.63971257041645  | 4.79258679272746  |
| H | -2.37020834154043 | 11.44694983422607 | 5.39263895656390  |
| H | -1.73838403285323 | 13.12005557058556 | 7.10352748817486  |

### 3.7 Optimized Structure of 7 (S,S) in Gas Phase

!Grid4 FinalGrid5 PBE0 def2-TZVP d3bj tightopt freq

|                           |     |                                |
|---------------------------|-----|--------------------------------|
| Total enthalpy            | ... | -2498.46215026 Eh              |
| Total entropy correction  | ... | -0.10085220 Eh -63.29 kcal/mol |
| -----                     |     |                                |
| Final Gibbs free enthalpy | ... | -2498.56300246 Eh              |

68

Coordinates from ORCA-job Input

|   |                  |                  |                  |
|---|------------------|------------------|------------------|
| P | 0.09812794081455 | 7.07478996063122 | 5.67778509408559 |
| P | 1.68173746625078 | 8.40556528683055 | 6.46010671719353 |

|    |                   |                   |                   |
|----|-------------------|-------------------|-------------------|
| C  | 1.14116942239127  | 6.19259606160349  | 4.53790073315097  |
| C  | -0.15071257532312 | 5.56784241904074  | 6.65185130667388  |
| C  | 2.27703030830874  | 8.92770925968421  | 4.79443609308609  |
| C  | 1.08505170259539  | 4.81180628292060  | 4.75543436526175  |
| C  | 1.98742358934932  | 6.75971136000764  | 3.59338283818490  |
| Si | -1.19858158365541 | 5.45775402483451  | 8.18924147352501  |
| C  | 0.33147122963247  | 4.50328528624935  | 5.95539719155018  |
| C  | 2.30729709510981  | 8.17957024960884  | 3.67151637560608  |
| Si | 2.93960289979109  | 10.68462346855366 | 4.80683044326200  |
| C  | 1.77232333197879  | 3.96346671751783  | 3.88750850234754  |
| C  | 2.65755421176429  | 5.89648604189909  | 2.72691355285799  |
| C  | -0.43471081977751 | 6.55391417280247  | 9.50684938962229  |
| C  | -1.24218781614435 | 3.68293413960329  | 8.77684674742685  |
| C  | -2.92089730177930 | 6.07729654179629  | 7.80235196688518  |
| H  | 0.17211403897698  | 3.47479120308589  | 6.26842702343239  |
| H  | 2.72716456793246  | 8.62431954952930  | 2.76965082524402  |
| C  | 3.85688462505629  | 10.97871427138635 | 3.19688129200768  |
| C  | 4.11837321132402  | 10.85182179504830 | 6.25145406454193  |
| C  | 1.52137110065957  | 11.88954994944901 | 4.98928407389043  |
| H  | 1.73104318622946  | 2.88757702427299  | 4.01806617768384  |
| C  | 2.52783905091938  | 4.51618200166792  | 2.86301343296706  |
| H  | 3.32228385255066  | 6.30611412055657  | 1.97329763838663  |
| C  | -0.49484195775126 | 7.94453963812131  | 9.38838567584310  |
| C  | 0.26020239965769  | 6.02281529962493  | 10.59456043379233 |
| H  | -1.80000436718989 | 3.60038254771515  | 9.71304604460658  |
| H  | -0.23783855206942 | 3.28633658609298  | 8.94349068222248  |
| H  | -1.73662527793845 | 3.04686926650533  | 8.03846784120861  |
| H  | -3.55231092987249 | 6.05720499510555  | 8.69414403639492  |
| H  | -3.38669231007936 | 5.45757626328193  | 7.03223016802167  |
| H  | -2.89500484399369 | 7.10339737104907  | 7.42774463795976  |
| C  | 5.07559589521599  | 10.33781775107763 | 2.95606422612070  |

|   |                   |                   |                   |
|---|-------------------|-------------------|-------------------|
| C | 3.34732710698831  | 11.80403574913718 | 2.19400973840591  |
| H | 3.60865163383898  | 10.64464565006586 | 7.19588186483323  |
| H | 4.51940282727081  | 11.86754759787543 | 6.29678105251150  |
| H | 4.95687476397959  | 10.15703773340756 | 6.16804453048950  |
| H | 0.99308005361784  | 11.68976188708200 | 5.92492805072447  |
| H | 0.80160111554608  | 11.78836370074700 | 4.17384047384370  |
| H | 1.87705132530572  | 12.92291393082161 | 5.01284793659971  |
| H | 3.06142017710670  | 3.86420221799181  | 2.18111370281904  |
| H | -1.02149854432026 | 8.39625372754106  | 8.55328533814895  |
| C | 0.12477409426072  | 8.77379041009820  | 10.31094221333869 |
| H | 0.33120223453411  | 4.94695074601317  | 10.71594104026893 |
| C | 0.87703166898948  | 6.84570396067974  | 11.52590165993376 |
| H | 5.49929431237498  | 9.68505381577725  | 3.71378853738239  |
| C | 5.75871882701788  | 10.51335464955875 | 1.76304115336255  |
| H | 2.40352670947228  | 12.31721461492675 | 2.34687878576193  |
| C | 4.02583882034346  | 11.98591332874553 | 0.99669756526319  |
| H | 0.07764609481112  | 9.84968341566334  | 10.18795660609783 |
| C | 0.81376257460156  | 8.22430604175105  | 11.38267800452907 |
| H | 1.41289796279764  | 6.41117482701350  | 12.36258086982840 |
| C | 5.23302243399049  | 11.33989698767508 | 0.77933428341020  |
| H | 6.70348940603868  | 10.00698921339785 | 1.59909394834450  |
| H | 3.61097804990687  | 12.63306344492275 | 0.23193852815628  |
| H | 1.30256337439128  | 8.86962836631525  | 12.10362619332144 |
| H | 5.76505737169002  | 11.48003540273248 | -0.15486166498398 |
| C | 3.01515241043730  | 7.30216352771195  | 7.04538893937360  |
| C | 2.96760922936948  | 6.94566839685661  | 8.39394575482253  |
| C | 4.05375361967761  | 6.81649004494067  | 6.25402852589128  |
| C | 3.92351286326906  | 6.10081328692641  | 8.93244805205254  |
| H | 2.17563510059920  | 7.33269268454936  | 9.02409304710323  |
| C | 4.95170989797810  | 5.61645139713138  | 8.13612785453694  |
| H | 3.86665160488171  | 5.82907426066764  | 9.98050174515899  |

|   |                  |                  |                  |
|---|------------------|------------------|------------------|
| C | 5.01648652695335 | 5.98078103983985 | 6.79904771917061 |
| H | 4.10857037627440 | 7.09122750671332 | 5.20888017408324 |
| H | 5.81892179305649 | 5.60783744889887 | 6.17239282690612 |
| H | 5.70487939201415 | 4.96059807866961 | 8.55794388346570 |

### 3.8 Transition-State of Configurational Inversion of 7 at P-Ph in Gas Phase

!Grid6 FinalGrid7 PBE0 def2-TZVP d3bj optts numfreq

|                           |     |                                |
|---------------------------|-----|--------------------------------|
| Total enthalpy            | ... | -2498.41755467 Eh              |
| Total entropy correction  | ... | -0.09905821 Eh -62.16 kcal/mol |
| -----                     |     |                                |
| Final Gibbs free enthalpy | ... | -2498.51661288 Eh              |

68

Coordinates from ORCA-job Input

|    |                  |                  |                   |
|----|------------------|------------------|-------------------|
| P  | 5.00985148684332 | 4.38201250598389 | 13.17227882038468 |
| C  | 4.21298666743295 | 4.19967499061516 | 14.79309757814461 |
| P  | 5.34285104535168 | 6.45935420259634 | 13.66890582337721 |
| C  | 6.36308861745800 | 3.29312467724023 | 13.70017221043982 |
| C  | 3.19872113349338 | 4.97369027512444 | 15.36468068099170 |
| C  | 4.76097112324461 | 3.09224301292712 | 15.46078653064078 |
| C  | 3.86194881214940 | 7.12660541232952 | 14.31404659735021 |
| C  | 6.79824995418390 | 7.44520758689608 | 13.43683698263582 |
| C  | 7.60328255193699 | 7.27073494661391 | 12.30687245618771 |
| C  | 5.96596119364746 | 2.61932673907514 | 14.80941816366484 |
| Si | 7.89683049920972 | 2.95818429496983 | 12.70076965928658 |
| C  | 2.93767728392721 | 6.32540302070162 | 14.92774306069173 |
| C  | 2.60031274240452 | 4.46405903928429 | 16.52659476444340 |
| C  | 4.16072246955661 | 2.62098244442370 | 16.62384507399010 |
| Si | 3.41306615802275 | 8.93949674133919 | 14.02048492988464 |

|   |                   |                   |                   |
|---|-------------------|-------------------|-------------------|
| C | 7.15274195140549  | 8.41106023780386  | 14.38269358374507 |
| H | 6.57194576041357  | 8.50604327357104  | 15.29155244849746 |
| C | 8.72723688161608  | 8.05386579206663  | 12.12652458214135 |
| H | 7.33902613873981  | 6.52447326604213  | 11.56722178970297 |
| H | 6.51802987972487  | 1.77325124236822  | 15.21194730990099 |
| C | 7.49854625243294  | 3.09753897006310  | 10.87761299843849 |
| C | 8.55714676680438  | 1.25280403759198  | 13.09870791361067 |
| C | 9.17447124443082  | 4.24815544603620  | 13.17307598583538 |
| H | 1.99606746988160  | 6.76985806275079  | 15.23768006101221 |
| C | 3.05421373281284  | 3.29782309450971  | 17.12395819553842 |
| H | 1.80085207552880  | 5.03084804564107  | 16.99224789304034 |
| H | 4.55074323551338  | 1.74556769630604  | 17.13073385644575 |
| C | 4.16184810286754  | 9.56231558514535  | 12.42654137095429 |
| C | 3.94444857140244  | 10.01097822692457 | 15.46155557016263 |
| C | 1.54095065820333  | 8.99688221976772  | 13.88262114860006 |
| C | 8.25349657073724  | 9.22410692914098  | 14.16794195933153 |
| C | 9.04722646178841  | 9.04636389888823  | 13.04451886105557 |
| H | 9.35266987710279  | 7.89611323380776  | 11.25605668468435 |
| H | 8.39364737090794  | 2.96514837308835  | 10.26466142546890 |
| H | 7.07066837731645  | 4.07444607106744  | 10.63892497758648 |
| H | 6.77247871327732  | 2.33595921511677  | 10.58326812180396 |
| H | 7.83525754192614  | 0.47509253401767  | 12.83746886898713 |
| H | 8.79546977793554  | 1.16137544528466  | 14.16112805223491 |
| H | 9.47812113828653  | 1.06584124529469  | 12.54021695622387 |
| C | 9.06966788270420  | 4.96487376745588  | 14.36629038512049 |
| C | 10.27755863469058 | 4.49970274891729  | 12.35418589865786 |
| H | 2.56727625592614  | 2.93833061715164  | 18.02319530017505 |
| H | 3.81840531922498  | 10.58215406345956 | 12.23384665481193 |
| H | 3.85649337730003  | 8.93699794368631  | 11.58455974619906 |
| H | 5.25279582519958  | 9.56755691630892  | 12.46370482349882 |
| H | 5.03045137294312  | 10.11086982467564 | 15.49375518983880 |

|   |                   |                   |                   |
|---|-------------------|-------------------|-------------------|
| H | 3.61289396169732  | 9.59007649143502  | 16.41362502326577 |
| H | 3.52528701743033  | 11.01629568799475 | 15.36517353285283 |
| C | 0.89808916293053  | 8.31456537400703  | 12.84595897101032 |
| C | 0.74862138115736  | 9.70800425057990  | 14.78335535858321 |
| H | 8.50913342208535  | 9.98120601217337  | 14.90080578176631 |
| H | 9.92130104897989  | 9.66784501968214  | 12.89082664586093 |
| H | 8.21201219460861  | 4.80557574924784  | 15.01201591362213 |
| C | 10.02970516130221 | 5.89637272164621  | 14.73074030620367 |
| C | 11.24185848704627 | 5.42895599034550  | 12.71319639043027 |
| H | 10.38961899331042 | 3.96481236558184  | 11.41546193785766 |
| H | 1.48465901635371  | 7.73736056221345  | 12.13748295560337 |
| C | -0.48001665531038 | 8.34477165394814  | 12.71098314591090 |
| C | -0.63400601532528 | 9.74062550945918  | 14.65660742426636 |
| H | 1.21302116709940  | 10.24607079303555 | 15.60314280956519 |
| H | 9.91932857717386  | 6.45313247009564  | 15.65417432360376 |
| C | 11.11798242149700 | 6.12943806036313  | 13.90446115202720 |
| H | 12.08960691017825 | 5.61049921356087  | 12.06163385351816 |
| H | -0.95709120457238 | 7.80729537789464  | 11.89905812620638 |
| C | -1.25013340195662 | 9.05978240554257  | 13.61883432803785 |
| H | -1.23019643882744 | 10.29814971025361 | 15.37049109402577 |
| H | 11.86514241207637 | 6.86385400213648  | 14.18341233013967 |
| H | -2.32929257684201 | 9.08304266473244  | 13.51706665022375 |

### 3.9 Transition-State of Configurational Inversion of 7 at PC<sub>4</sub> in Gas Phase

!Grid6 FinalGrid7 PBE0 def2-TZVP d3bj optts numfreq

Total enthalpy ... -2498.43224795 Eh

Total entropy correction ... -0.10038288 Eh -62.99 kcal/mol

-----  
Final Gibbs free enthalpy ... -2498.53263083 Eh

## Coordinates from ORCA-job Input

|    |                  |                   |                   |
|----|------------------|-------------------|-------------------|
| P  | 6.07831248508092 | 5.02423403435716  | 14.04891990884296 |
| C  | 4.57538386858753 | 4.34970179115253  | 14.47977239401771 |
| P  | 6.04559250266479 | 7.14769024544912  | 13.76677995254079 |
| C  | 7.02019498382661 | 3.55544548486513  | 14.12959413715592 |
| C  | 3.36782034559198 | 5.02028872743597  | 14.69284444110834 |
| C  | 4.75745907934297 | 2.96016284766529  | 14.66884611185067 |
| C  | 4.29020358097905 | 7.35117175902789  | 14.26372671942259 |
| C  | 5.89962544823348 | 7.28287607814552  | 11.93926458451611 |
| C  | 4.78648002210022 | 6.84207580944277  | 11.22861887818333 |
| C  | 6.11533785246703 | 2.55871017361302  | 14.46059527764854 |
| Si | 8.83398203844196 | 3.40524227471798  | 13.74885216527902 |
| C  | 3.31621781255788 | 6.46438923977286  | 14.57901606186927 |
| C  | 2.28053623345203 | 4.24438982574492  | 15.06438651789487 |
| C  | 3.62750899751279 | 2.21774350122133  | 15.04658956534252 |
| Si | 3.87569335215750 | 9.18871425704498  | 14.43498583689715 |
| C  | 6.96442263153329 | 7.86062986042726  | 11.25580137133293 |
| H  | 7.82744127757923 | 8.21486422235061  | 11.81114459097766 |
| C  | 4.74116614589055 | 6.98177955235546  | 9.85211637910179  |
| H  | 3.95806915672350 | 6.38776534188384  | 11.76105758397719 |
| H  | 6.42705180363073 | 1.52370759051303  | 14.55033198278196 |
| C  | 9.14824791178469 | 4.21552214808274  | 12.09108490114200 |
| C  | 9.30523442564986 | 1.59732557874913  | 13.72121008433639 |
| C  | 9.81042635682166 | 4.32030197471881  | 15.06444783418052 |
| H  | 2.33927105836814 | 6.88893778737285  | 14.81160611030630 |
| C  | 2.41514480016504 | 2.85687235891284  | 15.22642420635253 |
| H  | 1.32024309705114 | 4.71739648166300  | 15.24265810353492 |
| H  | 3.70705814669462 | 1.14794923862870  | 15.20941782029170 |
| C  | 4.76873141415831 | 10.21705840907164 | 13.15097216866763 |
| C  | 4.38431671602783 | 9.74675760769904  | 16.14595498465568 |



|   |                   |                   |                   |
|---|-------------------|-------------------|-------------------|
| C | 2.02667189063348  | 9.37272443157687  | 14.18988075431784 |
| C | 6.92360325874311  | 7.99076278220555  | 9.87464113060036  |
| C | 5.81031872251758  | 7.55496260839872  | 9.17328632346105  |
| H | 3.87171846885208  | 6.63837218608110  | 9.30287373428146  |
| H | 10.20603933883531 | 4.16049764224628  | 11.82194228364749 |
| H | 8.86319518879224  | 5.27110889376408  | 12.11204597671098 |
| H | 8.56115780903055  | 3.73283560198798  | 11.30605234871902 |
| H | 8.73571104362431  | 1.06982828213738  | 12.95229043393597 |
| H | 9.10559079211576  | 1.11461529830456  | 14.68085497669916 |
| H | 10.36713391407774 | 1.47421618370164  | 13.49410859287336 |
| C | 10.74913624549019 | 3.67826209058687  | 15.87192104989100 |
| C | 9.60685630442913  | 5.68820243391961  | 15.26464453365880 |
| H | 1.54783220447330  | 2.27639562140005  | 15.51834738327247 |
| H | 4.49796258785007  | 11.26742322896715 | 13.28969982928096 |
| H | 4.49852618838085  | 9.92663862160383  | 12.13406095707164 |
| H | 5.85413945008342  | 10.13447010056115 | 13.24645673457921 |
| H | 5.45782385592013  | 9.58983851538671  | 16.27943257462394 |
| H | 3.86785003880905  | 9.17500580863279  | 16.92022229913807 |
| H | 4.17710391351745  | 10.80916742051433 | 16.29896184817436 |
| C | 1.46209642542376  | 9.08767177302105  | 12.94339760160250 |
| C | 1.17395118720184  | 9.77787920928373  | 15.21637947825433 |
| H | 7.75858277925364  | 8.43846299002008  | 9.34805276945514  |
| H | 5.77294713947532  | 7.66111764040671  | 8.09518900239724  |
| H | 10.93192561889974 | 2.61584309247182  | 15.74719263379886 |
| C | 11.45922717955437 | 4.37203081739442  | 16.84232652545370 |
| C | 10.30977746690911 | 6.38742507274011  | 16.23226953757502 |
| H | 8.88054457057143  | 6.22776065231886  | 14.66251745028666 |
| H | 2.09935796282271  | 8.76194781844532  | 12.12605657322273 |
| C | 0.09831890288947  | 9.20401534171600  | 12.72949360846172 |
| C | -0.19385400140431 | 9.89686458942604  | 15.00916560809709 |
| H | 1.58011733373684  | 10.00494475446198 | 16.19671830878861 |

|   |                   |                   |                   |
|---|-------------------|-------------------|-------------------|
| H | 12.18339381809319 | 3.85132088859636  | 17.45904433392856 |
| C | 11.24011427335103 | 5.72854923857033  | 17.02428398401411 |
| H | 10.12966317902606 | 7.44759755985450  | 16.37122539315048 |
| H | -0.31949137612244 | 8.97783964374818  | 11.75482050781410 |
| C | -0.73315637745484 | 9.60970684208959  | 13.76501274020595 |
| H | -0.83919256097372 | 10.21346212204409 | 15.82095405284726 |
| H | 11.79143649825910 | 6.27240971201095  | 17.78304171537525 |
| H | -1.80089478076341 | 9.70087828731785  | 13.60070373612443 |

### **3.10 Input Line for NMR Calculation of NICS(0) of 5**

!Grid5 FinalGrid6 HF def2-TZVP AutoAux d3bj NMR

### **3.11 Input Line for NMR Calculation of Phosphoric Acid**

!Grid7 NoFinalgrid PBE0 def2-TZVP d3bj CPCM(Chloroform) AutoAux NMR

### **3.12 Input Line for NMR Calculation of 7 (S,R)**

!Grid7 NoFinalgrid PBE0 def2-TZVP d3bj CPCM(Chloroform) AutoAux NMR

### **3.13 Input Line for NMR Calculation of 7 (S,S)**

!Grid7 NoFinalgrid PBE0 def2-TZVP d3bj CPCM(Chloroform) AutoAux NMR
